1 **HIV-1 Vpu promotes phagocytosis of infected CD4<sup>+</sup> T cells by macrophages through**  
2 **downregulation of CD47**

3

4 Lijun Cong<sup>a</sup>, Scott M. Sugden<sup>a</sup>, Pascal Leclair<sup>b</sup>, Chinten James Lim<sup>b</sup>,  
5 Tram NQ. Pham<sup>a</sup>, Éric A. Cohen<sup>a,c,#</sup>

6

7 <sup>a</sup>Laboratory of Human Retrovirology, Institut de Recherches Cliniques de Montréal (IRCM),  
8 Montreal, Quebec, Canada; <sup>b</sup>Department of Pediatrics, University of British Columbia,  
9 Vancouver, Canada; <sup>c</sup>Department of Microbiology, Infectiology and Immunology, Faculty of  
10 Medicine, Université de Montréal, Montreal, Quebec, Canada.

11 # Corresponding author.

12

13 Correspondence: Éric A. Cohen  
14 Institut de Recherches Cliniques de Montréal (IRCM)  
15 110 Pine avenue west, Montreal, Quebec  
16 Canada, H2W 1T5  
17 Tel: 514-987-5804  
18 Email: [eric.cohen@ircm.qc.ca](mailto:eric.cohen@ircm.qc.ca)

19

20 **Running title: HIV-1 Vpu downregulates CD47 protein**

21

22

23 Abstract: 231/250 words (importance section: 148/150 words)

24 Main text: 4864/5000 words

25 Figures: 6

26 Supplementary materials: 6 Supplementary Figures and 1 Supplementary table

27

28

29

30 **ABSTRACT:** Human immunodeficiency virus (HIV) remodels the cell surface of infected cells  
31 to facilitate viral dissemination and promote immune evasion. The membrane-associated Vpu  
32 accessory protein encoded by HIV-1 plays a key role in this process by altering cell surface  
33 levels of multiple host proteins. Using an unbiased quantitative plasma membrane profiling  
34 approach, we previously identified CD47 as a putative host target downregulated by Vpu.  
35 CD47 is a ubiquitously-expressed cell surface protein that interacts with the myeloid cell  
36 inhibitory receptor SIRP $\alpha$  to deliver a “don’t-eat-me” signal, thus protecting cells from  
37 phagocytosis. In this study, we investigate whether CD47 modulation by HIV-1 Vpu might  
38 promote the susceptibility of macrophages to viral infection via phagocytosis of infected CD4<sup>+</sup>  
39 T cells. Indeed, we find that Vpu downregulates CD47 expression on infected CD4<sup>+</sup> T cells  
40 leading to an enhanced capture and phagocytosis by macrophages. Interestingly, it is through  
41 this process that a CCR5-tropic transmitted/founder (T/F) virus, which otherwise poorly  
42 infects macrophages in its cell-free form, becomes infectious in macrophages. Importantly,  
43 we show that HIV-1-infected cells expressing a Vpu-resistant CD47 mutant are less prone to  
44 infect macrophages through phagocytosis. Mechanistically, Vpu forms a physical complex  
45 with CD47 through its transmembrane domain and targets the latter for lysosomal  
46 degradation. These results reveal a novel role of Vpu in modulating macrophage infection,  
47 which has important implications for HIV-1 transmission in early stages of infection and the  
48 establishment of viral reservoir.

49 **IMPORTANCE:** Macrophages play critical roles in HIV transmission, viral spread early in  
50 infection, and as a reservoir of virus. Selective capture and engulfment of HIV-1 infected T

51 cells was shown to drive efficient macrophage infection suggesting that this mechanism  
52 represents an important mode of infection notably for weakly macrophage-tropic T/F viruses.  
53 In this study, we provide insight into the signals that regulate this process. We show that the  
54 HIV-1 accessory protein Vpu downregulates cell surface levels of CD47, a host protein that  
55 interacts with the inhibitory receptor SIRP $\alpha$  to deliver a “don’t-eat-me” signal to macrophages.  
56 This allows for enhanced capture and phagocytosis of infected T cells by macrophages,  
57 ultimately leading to their productive infection even with T/F virus. These findings provide new  
58 insights into the mechanisms governing the intercellular transmission of HIV-1 to  
59 macrophages with implications for the establishment of the macrophage reservoir and early  
60 HIV-1 dissemination *in vivo*.

61

62

63

64

65

66

67

68

69

70

71

## 72 INTRODUCTION

73 The viral protein U (Vpu) is a membrane-associated accessory protein encoded by  
74 human immunodeficiency virus type 1 (HIV-1) and related simian immunodeficiency viruses  
75 (SIVs) but not by HIV-2. Consistent with the roles of HIV-1 accessory proteins in targeting  
76 cellular restriction factors to favor immune evasion and viral dissemination, Vpu counteracts  
77 many host proteins including BST2/Tetherin to promote efficient viral particle release (1, 2)  
78 and CD4 to avoid superinfection and subsequent premature cell death (3). The  
79 downregulation of both CD4 and BST2 also protects HIV-1 infected CD4<sup>+</sup> T cells from  
80 antibody-mediated cellular cytotoxicity (ADCC) (4). Given the contribution of Vpu towards HIV  
81 pathogenesis, partly through targeting BST2 and CD4, there is a continuing interest in  
82 identifying additional Vpu targets. To date, a diverse list of host factors has been identified  
83 including CD1d, NTB-A/SLAMF6, PVR/CD155, CCR7, CD62L; SNAT1 (5), ICAM1/3 (6), CD99  
84 and PLP2 (7), PSGL-1 (8), Tim-3 (9), and there likely are more to be discovered. Indeed,  
85 using a stable isotope labelling of amino acids in cell culture (SILAC)-based proteomic  
86 approach, we and others previously identified CD47 as a potential target that is  
87 downmodulated by Vpu (6, 10).

88

89 CD47, also known as integrin-associated protein (IAP), is a ubiquitously-expressed type  
90 I transmembrane protein (11) that serves as a ligand of the signal regulatory protein-alpha  
91 (SIRP $\alpha$ , or CD172a), an inhibitory receptor mainly expressed on myeloid cells, like  
92 macrophages and dendritic cells (DCs) (12, 13), but also on cytolytic T lymphocytes (14). The

93 interaction between these two proteins results in a “don’t-eat-me” signal that inhibits  
94 phagocytosis of target cells expressing CD47 by macrophages and DCs, thus providing an  
95 important regulatory switch for the phagocytic function of these cells.

96

97       Macrophages make up a heterogenous population of immune cells that play important  
98 roles in tissue homeostasis and host defense against pathogens partly through their  
99 phagocytic function (15). They are increasingly recognized as important cellular targets of  
100 HIV-1 infection (16, 17). Indeed, given their relative lengthy life span and unique ability to  
101 resist HIV-1 cytopathic effects and CD8<sup>+</sup> T cell-mediated killing (18, 19), macrophages are  
102 thought to be an important viral sanctuary and vector for HIV-1 dissemination as well as a  
103 potential viral reservoir during antiretroviral therapy (ART) (20-23). Macrophages are among  
104 the early targets of HIV-1 infection given their proximity to the portal of viral entry, commonly  
105 the mucosal tissue (21, 24). They express the CD4 receptor and both chemokine coreceptors  
106 CXCR4 and CCR5. While macrophage-tropic (M-tropic) viruses mainly use CCR5 as  
107 coreceptor, they are paradoxically mostly isolated from brain tissues of AIDS patients at late  
108 stages of infection (17, 25). Yet Infected tissue macrophages can be detected at all stages of  
109 disease (26) and T/F viruses that initiate infection as well as inter-individual transmission are  
110 weakly M-tropic (27). It is therefore crucial to understand the mechanisms by which  
111 macrophages become infected during the early phase of infection. In this regard, it has been  
112 reported that macrophages capture SIV- or HIV-1-infected T cells, retain infectious particles  
113 in a non-degradative compartment and ultimately become infected (28-30). As well,

114 proinflammatory cytokines secreted shortly after infection (31) may activate macrophages  
115 and enhance the phagocytosis of infected CD4<sup>+</sup> T cells in proximity *in vivo*.

116

117 Putting our observation in this context, we investigated whether Vpu-mediated CD47  
118 downregulation would facilitate macrophage infection by promoting phagocytosis of HIV-1-  
119 infected CD4<sup>+</sup> T cells. In the current study, we report that Vpu downregulates CD47 from the  
120 surface of infected CD4<sup>+</sup> T cells. We also show that CD47 modulation by Vpu promotes  
121 enhanced capture and phagocytosis of T cells by monocyte-derived macrophages (MDMs),  
122 which ultimately leads to productive infection of MDMs. In addition, our findings uncover that  
123 through this process a T/F virus could efficiently infect MDMs, revealing a possible model for  
124 macrophage infection at early stages of infection. Importantly, mechanistic studies reveal that  
125 Vpu depletes CD47 via a process that requires its transmembrane domain (TMD) for binding  
126 CD47 as well as the DSGNES diserine motif and the ExxxLV trafficking motif for targeting  
127 CD47 to lysosome-dependent degradation.

128

## 129 **RESULTS**

### 130 **Vpu downregulates CD47 from the surface of HIV-1-infected CD4<sup>+</sup> T cells.**

131 We and others previously identified CD47 as a putative target for Vpu-mediated surface  
132 downregulation (6, 10). To verify the expression profile of CD47 in the context of HIV-1  
133 infection, we first examined the effect of Vpu on CD47 surface expression levels in HIV-1-  
134 infected SupT1 cells that do not express BST2 (32). Given that both BST2 and CD47 localize

135 to lipid rafts at the cell surface (12, 33), and as such might be part of supramolecular protein  
136 complexes, the use of SupT1 cells would allow us to determine whether the effect of Vpu on  
137 CD47 was independent from BST2 downmodulation by Vpu. To this end, SupT1 cells were  
138 infected with the CXCR4 (X4)-tropic GFP-marked NL4-3 HIV-1 (NL4-3) expressing (WT) or  
139 lacking Vpu (dU) and surface expression of CD47 was measured by flow cytometry at 48  
140 hours post-infection (hpi). Infection with WT HIV-1 resulted in an ~30% decrease in surface  
141 CD47 levels on infected cells as compared to bystander GFP<sup>-</sup> cells or cells infected with dU  
142 HIV-1, suggesting that modulation of CD47 by Vpu did not involve BST2 (Fig. 1). This  
143 downregulation of CD47 was also observed to varying extents in primary CD4<sup>+</sup> T cells  
144 infected with either X4-tropic NL4-3, CCR5 (R5)-tropic NL 4-3.ADA.IRES.GFP (NL 4-3 ADA)  
145 or R5-tropic T/F WITO virus expressing Vpu. Importantly, no such modulation in CD47  
146 expression was noted in cells infected with the respective dU derivatives of these viruses (Fig.  
147 1), further confirming a Vpu-dependent downregulation of CD47 during HIV infection of  
148 primary CD4<sup>+</sup> T cells.

149

150 CD47 is reported to undergo post-translational pyroglutamate modification at the SIRP $\alpha$   
151 binding site by the glutaminyl-peptide cyclotransferase-like protein (QPCTL), a modification  
152 that is thought to positively regulate the CD47/SIRP $\alpha$  axis by enhancing SIRP $\alpha$  binding (34).  
153 Since CD47 surface expression was detected using anti-human CD47 mAb clone CC2C6,  
154 which specifically recognizes the pyroglutamate of CD47, we next assessed whether Vpu  
155 targeting of CD47 is dependent or independent of the pyroglutamate epitope. Using the anti-

156 human CD47 mAb clone B6H12 that recognizes all forms of CD47 at the cell surface, we  
157 found that the extent of Vpu-mediated downregulation of CD47 (~40%) was comparable to  
158 that detected with the CC2C6 mAb in infected Jurkat E6.1 cells (Fig. S1). Together, these  
159 data show that Vpu downregulates all forms of CD47 from the surface of HIV-1-infected CD4<sup>+</sup>  
160 T cells.

161

162 **Vpu-mediated CD47 downregulation enhances capture and phagocytosis of infected**  
163 **T cells by MDMs.**

164 CD47 is known to function as a marker of “self” that protects healthy cells from being  
165 engulfed by macrophages. Accordingly, hematopoietic cells lacking CD47 are efficiently  
166 cleared by macrophages (35). Therefore, we hypothesized that Vpu-mediated  
167 downregulation of CD47 modulates the capture and phagocytosis of HIV-1-infected T cells  
168 by MDMs. To test this, we generated a CD47 knockout (CD47KO) Jurkat E6.1 cell line (Fig.  
169 S2A and B). First, target Jurkat cells (CD47 expressing control and CD47KO) were infected  
170 with NL 4-3 ADA (WT or dU) for 48 h, then labelled with CFSE and cocultured with MDMs for  
171 2 h to assess the capture of labelled T cells by CD11b-expressing macrophages using flow  
172 cytometry, as described in material and methods (Fig. 2A). As shown in Fig. 2B, we observed  
173 a significantly higher frequency of CD11b<sup>+</sup>/CFSE<sup>+</sup> MDMs upon coculture with WT-infected  
174 CD47-expressing Jurkat cells (~12 %, average of n=4) compared to those cocultured with  
175 mock- or dU-infected Jurkat cells (~7.5 or 8.8 %, respectively, average of n=4). When MDMs  
176 were cocultured with CD47KO Jurkat cells, there was an overall increase in capture of target



177 cells (21.5 to 23.3 %, average of n=4 for mock and WT, respectively) regardless of whether  
178 they were infected with WT or dU virus (Fig. 2B; Fig. S2C). In keeping with an inverse  
179 correlation between cell capture efficiency and CD47 expression on target cells, these results  
180 indicate that Vpu-mediated CD47 downregulation enhanced the susceptibility of T cells to be  
181 taken up by MDMs.

182

183 To directly demonstrate that this process was a consequence of phagocytosis, we  
184 performed similar experiments using target cells labelled with pHrodo, a pH-sensitive dye  
185 that becomes fluorescent within the acidic environment of phagolysosomes, thus enabling an  
186 accurate measurement of *bona fide* phagocytosis. Indeed, using this approach we also  
187 observed a significantly higher frequency of CD11b<sup>+</sup>/pHrodo<sup>+</sup> cells when MDMs were  
188 cocultured with WT (6.3 %, average of n=5) instead of dU (3.2 %, average of n=5) virus-  
189 infected targets (Fig. 2C). Also consistent with the data from the capture assay (Fig. 2B; Fig.  
190 S2C), CD47KO target cells were more efficiently phagocytosed by MDMs and the extent of  
191 which was comparable among uninfected, WT- or dU-virus (10.8, 12.8 and 14.6 %,   
192 respectively, average of n=5) infected targets (Fig. 2C; Fig. S2D). Importantly the differential  
193 impact of Vpu on the capture and phagocytosis of CD47-expressing T cells was not linked to  
194 an increase in the frequency of Annexin<sup>+</sup> apoptotic target cells, a condition known to trigger  
195 phagocytosis by MDMs (Fig. S2E). Taken together, these results indicate that Vpu promotes  
196 both capture and phagocytosis of target cells.

197

198 **Phagocytosis of infected CD4<sup>+</sup> T cells promotes productive infection of MDMs by T/F**  
199 **virus.**

200 T/F viruses were reported to display a much weaker tropism for MDMs compared to truly  
201 M-tropic virus strains (27). Indeed, there was no detectable infection (based on intracellular  
202 Gag p24) of MDMs using WITO T/F virus (MOI = 5), whereas infection with a cell-free WT NL  
203 4-3 ADA virus (M-tropic, MOI = 2) resulted in up to 1.5 - 5 % of p24<sup>+</sup> cells (Fig. S3A). To  
204 investigate whether WITO could infect MDMs via phagocytosis of infected primary CD4<sup>+</sup> T  
205 cells, MDMs were either cocultured with CD4<sup>+</sup> T cells infected (to a comparable level, Fig.  
206 S3B) with either ADA or WITO viruses or cultured in the presence of the corresponding virion-  
207 containing supernatants from T cell cultures prior to extensive washes to eliminate input  
208 target T cells or virions. The former was referred to as “co-culture” while the latter, was  
209 designated “cell-free” in Fig. 3. Conditioned supernatant from both “co-culture” and “cell-free”  
210 infections was collected at various time points and quantified for infectious particles using a  
211 TZM-bl cell-based luciferase reporter assay (Fig. 3A). While the media from cell-free-infected  
212 MDMs revealed a modest luciferase activity for both ADA and WITO infections, that from  
213 MDMs cocultured with infected CD4<sup>+</sup> T cells showed meaningfully higher levels (Fig. 3B).  
214 Interestingly, we observed an approximately 6- to 9-fold higher viral production (day 2) for  
215 MDMs cocultured with WITO-infected CD4<sup>+</sup> T cells compared to those with ADA-infected cells,  
216 despite the initially comparable infection of CD4<sup>+</sup> T cells at the time of the cocultures (Fig. 3B;  
217 Fig. S3B). These results show that HIV and notably T/F viruses can productively infect MDMs  
218 through cell-to-cell contact with infected CD4<sup>+</sup> T cells. To directly support the notion that

219 capture and engulfment of infected T cells was occurring in these conditions, MDMs  
220 cocultured with T cells infected with GFP-marked viruses were processed for immunostaining  
221 and analysis by confocal microscopy. As shown in Figure 3C, the presence of GFP<sup>+</sup> MDMs  
222 in close contact with T cells or containing intact GFP<sup>+</sup> T cells could be observed. Furthermore,  
223 MDMs displaying a GFP signal following cell-contact showed the presence of multiple nuclei  
224 and harbored Gag p17 immunostaining in internal compartments as well as at the cell  
225 periphery, suggesting the intercellular transfer of fully mature virus particles to MDM (Figure  
226 3D). Taken together with the capture/ phagocytosis data (Fig. 2), we assert that the improved  
227 infection of MDMs is likely a consequence of their engulfment of infected CD4<sup>+</sup> T cells.

228

229 To provide evidence that the infection of MDMs was indeed due to phagocytosis, we  
230 introduced Jasplakinolide (Jasp) to the cocultures (Fig. 4A). Jasp was reported to promote  
231 actin polymerization and stabilize actin filaments, thereby inhibiting cellular processes  
232 dependent on actin dynamics including phagocytosis (28, 36). In brief, MDMs were pretreated  
233 with Jasp, cocultured with WITO-infected CD4<sup>+</sup> T cells, and analyzed by flow cytometry for  
234 phagocytosis activity (Fig. 4B) and the frequency of infected (Fig. 4C) MDMs. Treatment of  
235 MDMs with Jasp effectively inhibited phagocytosis (Fig. 4B) and blocked the infection (Fig.  
236 4C). Consistent with these findings, the level of infectious viral particles, measured via  
237 luciferase activity in TZM-bl cells was negligible in the supernatant of MDMs cultures following  
238 Jasp treatment (Fig. 4D). As well, the fact that reverse transcriptase inhibitor zidovudine  
239 (AZT) or integrase inhibitor raltegravir (Ral) (Fig. S4A and B) could block MDMs infection

240 following coculture of WITO-infected CD4<sup>+</sup> T cells further validates the authenticity of the  
241 MDMs infection.

242

243 Given that the effect of actin filament disruption on HIV-1 viral release remained unclear  
244 (37), we assessed whether Jasp treatment would affect virion release, which would ultimately  
245 interfere with MDMs infection. To this end, WITO-infected T cells were washed to remove  
246 cell-free virions and then cultured in the presence or absence of Jasp. As shown in Fig. 4E,  
247 Jasp treatment did not affect the release of viral particles from T cells. Altogether, using  
248 different cell-based assays, we provide evidence that the ability of MDMs to phagocytose  
249 infected T cells rendered them susceptible to infection by viruses which would otherwise be  
250 poorly infectious.

251

252 **Vpu binds CD47 via its transmembrane domain (TMD) and targets CD47 for lysosomal**  
253 **degradation.**

254 We next sought to understand the mechanism involved in Vpu-mediated CD47  
255 antagonism. HEK 293T cells were co-transfected with plasmids expressing CD47 and Vpu  
256 and analyzed by Western blotting for CD47 expression. CD47 was downregulated by Vpu in  
257 a dose-dependent manner by as much as 70% (Fig. 5A), bringing the question as to how,  
258 mechanistically, Vpu mediates the depletion. Thus, we generated Vpu variants that contain  
259 mutations within the main functional domains including the: (1) A15L-W23A in the TMD that  
260 is involved in various target interactions (38, 39), (2) S53/57A mutation within the DSGNES

261 diserine motif that is involved in the recruitment of the SCF<sup>βTrCP</sup> E3 ubiquitin ligase,  
262 responsible for ubiquitination and degradation of several Vpu targets (40, 41), and (3)  
263 A<sub>63</sub>XXXA<sub>67</sub>V (AxxxAV for short) within the ExxxLV trafficking motif, which targets Vpu-  
264 containing complexes to intracellular compartments away from the plasma membrane (42).  
265 To this end, we found that all three Vpu mutants prevented CD47 depletion (Fig. 5B and  
266 C(input)), suggesting the importance of the main functional domains of Vpu in this process.  
267 Indeed, the A15L-W23A mutant was unable to bind CD47 (Fig. 5C), implying that the Vpu  
268 TMD mediates the complex formation with CD47. To determine whether Vpu induces CD47  
269 protein degradation by either the proteasomal or lysosomal pathway, we treated Vpu- and  
270 CD47-expressing HEK 293T transfectants with proteasomal inhibitor MG132 or lysosomal  
271 inhibitor Concanamycin A (ConA) and found that ConA, but not MG132 prevented CD47  
272 depletion (Fig. 5D). Collectively, these results indicate that Vpu binds CD47 via its TMD and  
273 targets the host protein for lysosomal degradation. Conceivably, this process requires both  
274 the SCF<sup>βTrCP</sup>-recruiting DSGNES diserine motif as well as the ExxxLV trafficking signal,  
275 consistent with the lack of CD47 degradation by the S53/57A and AxxxAV mutants.

276

277 Furthermore, given that Vpu is typically involved in TMD-TMD interactions with its target  
278 proteins, we generated a chimeric CD47 mutant, composed of the extracellular domain  
279 (ECD1, aa 1-141) of human CD47 as well as the five membrane-spanning domains (MSDs)  
280 and the cytoplasmic tail (CT) of mouse CD47 (Fig. S5), which displays ~26% of aa sequence  
281 divergence mainly found in the first and second MSDs. In this configuration, CD47 became

282 largely resistant to Vpu-mediated degradation, consistent with the fact that the mouse CD47  
283 counterpart was insensitive to Vpu (Fig. S5). These results suggest that the MSDs are  
284 important determinants of human CD47 susceptibility to Vpu-mediated degradation.

285

286 **HIV-1-infected cells expressing Vpu-resistant chimeric CD47 are less prone to infect**  
287 **macrophages through phagocytosis.**

288 Given that chimeric CD47 was resistant to Vpu-mediated degradation, we next asked if  
289 expression of this mutant would alter target cell susceptibility to phagocytosis by MDMs. To  
290 this end, we used a CD47KO Jurkat cell line (JC47) (43) to generate cell lines stably  
291 expressing either the human-mouse chimeric CD47 (JC47-cCD47) or human CD47 (JC47-  
292 hCD47). Cells were selected and enriched by fluorescence-activated cell sorting (FACS) to  
293 obtain CD47 expression levels comparable to those detected on the parental Jurkat cells (Fig.  
294 6A). Upon infection of these cell lines with NL 4-3 ADA WT HIV-1, we observed  
295 downregulation of CD47 by 40 % on JC47-hCD47 cells but only by 10 % on those expressing  
296 the chimeric JC47-cCD47 (Fig. 6B). Next, we investigated the susceptibility of uninfected  
297 (mock) and infected JC47-derived cell lines to phagocytosis by MDMs. First, we found that  
298 JC47-hCD47 cells were phagocytosed by MDMs to a similar degree as JC47-cCD47 cells,  
299 since both showed ~ 5% CD11b<sup>+</sup>/pHrodo<sup>+</sup> cells, suggesting that cCD47 was as effective as  
300 hCD47 at inducing a “don’t-eat-me” signal (Fig. 6C and Fig. 2C). Interestingly, upon infection  
301 with WT HIV-1, JC47-hCD47 cells were opsonized more efficiently than infected JC47-cCD47  
302 cells (Fig. 6C). Importantly, this difference in phagocytosis was not linked to apoptosis of

303 target cells (Fig. S6). Furthermore, and in agreement with the phagocytosis results, we  
304 observed a heightened virus production as measured by luciferase activity from MDMs co-  
305 cultured with WT HIV-infected JC47-hCD47 cells (Fig. 6D) compared to their chimeric JC47-  
306 cCD47 counterparts. Collectively, these results further underscore our observation that Vpu-  
307 mediated CD47 downregulation potentiates phagocytosis of infected T cells by MDMs and,  
308 consequently, promotes increased productive infection of MDMs.

309

## 310 **DISCUSSION**

311 In this study, we extend our previous SILAC-based observation that CD47 is a putative  
312 target of HIV-1 Vpu (6, 10) and reveal that Vpu indeed downregulates CD47 on CD4<sup>+</sup> T cells  
313 infected with lab-adapted X4-tropic NL 4-3, R5-tropic NL 4-3 ADA as well as T/F WITO virus  
314 (Fig. 1). These findings obtained in the context of HIV-1 infection are in contrast to those  
315 reported by the Hasenkrug group, which showed that CD47 was upregulated in different types  
316 of immune cells upon recognition of several pathogens including SARS-CoV-2, hepatitis C  
317 virus (HCV) and lymphocytic choriomeningitis virus (LCMV) (44, 45), suggesting that  
318 downregulation of CD47 is an evolved viral counter-measure which provides HIV with a  
319 selective advantage. Indeed, we show that Vpu-mediated CD47 downregulation leads to an  
320 enhanced capture and phagocytosis of infected CD4<sup>+</sup> T cells by MDMs, a process which  
321 ultimately leads to productive infection of macrophages. As well, our data show that the R5-  
322 tropic WITO T/F virus relies on phagocytosis to efficiently infect MDMs, raising the possibility  
323 that phagocytosis of infected cells is an important mechanism through which myeloid cells

324 get productively infected by HIV-1 and is likely consequential for inter-host HIV-1 transmission.

325

326       Macrophages were reported to engulf HIV-1-infected CD4<sup>+</sup> T cells, a process that leads  
327 to their own infection (28, 29), but the capture recognition signals remained unclear. Binding  
328 of CD47 to SIRP $\alpha$  suppresses multiple pro-phagocytosis signaling pathways including those  
329 mediated by IgG/Fc $\gamma$ R, complement/complement receptors, and calreticulin (46, 47),  
330 suggesting that decreased CD47 expression might trigger phagocytosis. Indeed, we show  
331 that Vpu-mediated CD47 downregulation enhanced capture and engulfment of infected T  
332 cells by MDMs (Fig. 2). Although modest, the effect was invariably reproducible and  
333 consistent with other studies which used Jurkat cell lines expressing differential surface levels  
334 of CD47 as target cells in phagocytosis assays (43, 48). Apart from calreticulin,  
335 phosphatidylserine (PS) is another critical pro-phagocytosis signal predominant on apoptotic  
336 cells (49). Nevertheless, CD47/ SIRP $\alpha$  signaling was recently reported to block the “eat-me”  
337 signal driven by PS (50). In the context of HIV-1 infection, we found more externalization of  
338 PS on the cell surface as measured by Annexin V staining (Fig. S2E), in line with previously  
339 reported results (51). However, although Vpu expression was reported to induce apoptosis  
340 (52), we did not observe a significant difference of PS exposure between cells infected with  
341 WT and dU NL 4-3 ADA HIV-1 (Fig. S2E) suggesting that the augmented phagocytosis of  
342 cells infected by WT virus was likely resulting from Vpu-induced decrease in CD47. Indeed,  
343 this notion was further supported by our finding that target T cells expressing human-mouse  
344 chimeric form of CD47 that are less responsive to Vpu-mediated downregulation were less



345 prone to phagocytosis by MDMs as compared to human CD47 expressing target cells (Fig.  
346 6C). Furthermore, since we show that knock-out of CD47 in Jurkat T cells results in a strong  
347 enhancement of phagocytosis by MDMs (Fig. S2D), our data are collectively consistent with  
348 findings showing that lack of CD47 results in augmented opsonization of red blood cells (35)  
349 and more efficient clearance of lymphohematopoietic cells by macrophages (53). Conversely,  
350 target cells with elevated cell surface CD47 are shown to be protected from phagocytosis by  
351 macrophages (48, 54).

352

353 Infection of macrophages can be detected throughout all stages of HIV-1 infection (26).  
354 However, M-tropic viruses are found at late stages of infection and virus isolated at early  
355 stages of infection display very limited tropism for macrophages (17, 25). We hypothesized  
356 that through phagocytosis of T/F virus-infected CD4<sup>+</sup> T cells, macrophages could become  
357 infected with these viruses, a process that would potentially initiate inter-host viral  
358 dissemination at early stages of HIV-1 infection. Indeed, we found that T/F virus WITO, which  
359 poorly infects MDMs by a cell-free route (Fig. S3A), as reported previously (27, 28, 55), was  
360 able to elicit a productive infection in MDMs. Interestingly, we observed that phagocytosis of  
361 WITO-infected CD4<sup>+</sup> T cells ultimately led to an approximately 6- to 9-fold higher viral  
362 production by infected MDMs compared to the engulfment of T cells infected with a M-tropic  
363 NL 4-3 ADA (Fig. 3B) despite comparable degree of CD47 downregulation by these viruses  
364 (Fig. 1). This implies a potentially more efficient infection of MDMs following opsonization of  
365 T cells infected with T/F WITO since the frequency of infected T cells was comparable at the

366 time of phagocytosis (Fig. S3B). This difference in infection efficiency between T/F WITO and  
367 HIV ADA may be linked to the differential impact of host antiviral restriction factors, and  
368 notably interferon-induced transmembrane proteins (IFITMs), which accumulate  
369 intracellularly during HIV-1 infection of macrophages (56, 57) and are incorporated into virions,  
370 thus reducing their infectivity (57). In this context, it was reported previously that as IFITMs  
371 incorporation increased (57), there was a decrease in the infectivity of virions produced by  
372 HIV-1 ADA-infected MDMs. In contrast, T/F viruses were reported to be relatively resistant to  
373 IFITMs-mediated restriction (58, 59) with WITO displaying the most resistance to IFITM3 and  
374 releasing the highest levels of infectious virions among all viral strains tested (59). That being  
375 said, given the gradual decrease in the level of infectious particles released by MDMs (Fig.  
376 3B), it is possible that other restriction factors present in macrophages including GBP5 (60)  
377 and MARCH8 (61), which inhibit the infectivity of macrophage-derived virions, could play a  
378 role in controlling viral dissemination.

379

380 Phagocytosis is a process known to be important for the elimination of engulfed  
381 pathogens and apoptotic cells (62). However, we show that inhibition of phagocytosis by Jasp  
382 is linked to a suppression of productive infection of MDMs (Fig. 4), suggesting that HIV-1  
383 takes advantage of this process to infect macrophages. Indeed, a recent study by the Kieffer  
384 group (29) in HIV-1-infected humanized mice provided evidence that bone marrow  
385 macrophages phagocytosed infected T cells and produced virus within enclosed intracellular  
386 compartments. Using electron tomography (ET), they observed macrophages phagocytosing

387 infected T cells, with mature and immature HIV-1 virions within macrophage phagosomes  
388 alongside engulfed cells at varying degrees of degradation. Moreover, virions were also  
389 observed to assemble and undergo budding and maturation within fully-enclosed  
390 compartments which would subsequently fuse with surface-accessible invaginations to  
391 release virions into the extracellular space. Since HIV-1 virions are inactivated in acidic  
392 environments (63), further investigation is needed to better understand how virions escape  
393 phagosomal degradation before a complete destruction of the ingested T cells. In fact, many  
394 microorganisms have evolved multiple strategies to prevent phagocytic destruction. For  
395 instance, *Mycobacterium tuberculosis* inhibits the acidification process of phagosomes via  
396 the exclusion of vesicular proton-ATPase thus hindering the maturation of these  
397 compartments (64); it also prevents the fusion of lysosomes with phagosome (65).  
398 Interestingly, we show herein that inhibition of reverse transcription and integration  
399 suppresses productive infection of MDMs by WITO (Fig. S4), suggesting that virions  
400 transferred to macrophages via phagocytosis of HIV-1-infected T cells were able to actively  
401 replicate in MDMs.

402

403 While phagocytosis of infected T cells by macrophages represents one route of infection  
404 of macrophages, other mode of cell-to-cell virus transfer have also been described in vitro. It  
405 was recently reported that contacts between infected T lymphocytes and macrophages could  
406 lead to virus spreading to macrophages via a two-step fusion process that involves fusion of  
407 infected T cell to macrophages and virus transfer to these newly formed lymphocytes/

408 macrophages fused cells. These newly formed cells were in turn able to fuse to neighboring  
409 uninfected macrophages leading to the formation of long-lived virus-producing multinucleated  
410 giant cells (MGCs) (66, 67). Although the formation of MGCs has been reported in the  
411 lymphoid organs and central nervous system of HIV-1-infected patients (68-70) and SIV-  
412 infected macaques (71), the presence of macrophage-T-cell fusion was not observed by the  
413 Kieffer group in humanized mice (29).

414

415 In the context of experiments aimed at investigating whether phagocytosis of infected T  
416 cells ultimately leads to productive infection of macrophages, we have intentionally avoided  
417 the comparison between WT or dU-infected target T cells. Considering that virions are  
418 tethered at the cell surface by BST2 in the absence of Vpu, phagocytosis of dU-infected CD4<sup>+</sup>  
419 T cells or fusion between these infected T cells and macrophages could inadvertently result  
420 in higher productive infection of MDMs. To circumvent this problem, we generated a Jurkat  
421 cell line expressing human-mouse chimeric CD47, which is relatively resistant to Vpu  
422 modulation (Fig. S5; Fig. 6A and B). Taking advantage of this system, we confirm that Vpu-  
423 mediated CD47 downregulation contributes to phagocytosis of HIV-1-infected CD4<sup>+</sup> T cells  
424 by MDMs, leading to enhanced productive infection of MDMs (Fig. 6C and D).

425

426 Mechanistically, we provide evidence that the main functional domains of Vpu are  
427 involved in the downregulation of CD47 and that Vpu interacts with CD47 via its TMD to target  
428 the latter for degradation via a lysosomal pathway (Fig. 5). Although the model of CD47

429 degradation seems rather similar to how Vpu depletes BST2; it remains unclear whether: (1)  
430 the DSGNES motif through the recruitment of SCF<sup>βTRCP1/2</sup> complex promotes CD47  
431 ubiquitination and (2) interaction of adaptor proteins to the ExxxLV trafficking motif of Vpu in  
432 complex with CD47 target CD47 to cellular compartment away from the plasma membrane.  
433 More detailed mechanistic studies are required to fully dissect processes underlying Vpu-  
434 mediated downregulation of CD47.

435

436 In summary, we report herein that CD47 is a new cellular target downregulated by HIV-  
437 1 Vpu. Such a decrease in CD47 expression allows for enhanced phagocytosis of infected T  
438 cells by macrophages, which ultimately leads to productive infection of this myeloid cell  
439 subset even with HIV strains that would otherwise be weakly M-tropic (i.e., T/F viruses). We  
440 posit that this process enables macrophages to be infected, including during early stages of  
441 HIV infection when M-tropic strains have not yet emerged. Taken together, our data identifies  
442 a mechanism whereby T/F virus-infected macrophages could be a source of viral reservoirs  
443 and promote viral dissemination to different tissues.

444

445

446

447

448

449

## 450 **MATERIALS AND METHODS**

### 451 **Antibodies**

452 For flow cytometry, the following antibodies (Abs) were used: PE/Cy7-conjugated mouse anti-  
453 human CD47 (clone CC2C6) monoclonal Ab (mAb) and APC-conjugated anti-CD11b mAb  
454 (clone ICRF44) as well as corresponding isotype controls from BioLegend, APC-conjugated  
455 mouse anti-human CD47 mAb (clone B6H12; eBioscience), RD1-conjugated anti-Gag (clone  
456 KC57; Beckman Coulter). For immunoprecipitation and Western blot analysis, the following  
457 Abs were used: polyclonal sheep anti-human CD47 (AF4670) and sheep IgG HRP-  
458 conjugated Ab (HAF016) from R&D system; mouse anti-HA mAb (16B12), anti-GAPDH  
459 (FF26A/F9) and anti-CRISPR Cas9 (7A9) from BioLegend; rabbit anti-HA mAb (C29F4) from  
460 Cell Signaling Technology; rabbit anti-GFP (SAB4301138) from Sigma-Aldrich; anti- $\beta$ -actin  
461 (C4, sc-47778) from Santa Cruz Biotechnology; goat anti-rabbit IgG H+L (HRP, ab205718)  
462 and goat anti-mouse IgG H+L (HRP, ab 205719) from Abcam and anti-Vpu rabbit polyclonal  
463 serum as described previously (72). For confocal microscopy analysis, the following Abs were  
464 used: purified anti-CD11b (clone ICRF44; BioLegend), anti-p17 as previously described (73),  
465 Alexa Fluor 594-coupled donkey anti-mouse IgG H+L (Invitrogen, #A-21203).

466

### 467 **Plasmids**

468 The X4-tropic proviral construct pBR NL 4-3. IRES. GFP wild-type (WT) and its Vpu-deficient  
469 derivative (dU) were kindly provided by Frank Kirchhoff (74, 75). The R5-tropic pNL 4-3 ADA.  
470 IRES.GFP WT and dU were generated as described (76). The molecular clone of T/F virus

471 WITO was obtained from the NIH AIDS Reagent Program (#11919)(55) and the dU version  
472 of WITO was generated by overlapping PCR.

473 The pSVCMV-VSV-G plasmid encoding for the vesicular stomatitis virus glycoprotein G  
474 (VSV-G) was previously described (32). The lentiviral psPAX2 packaging vector was  
475 provided by Didier Trono (Addgene plasmid #12260). The lentivectors lentiCRISPR v2  
476 (plasmid #52961) (77) and pWPI-IRES-Puro-Ak (plasmid #154984) were also obtained  
477 through Addgene from Feng Zhang and Sonja Best, respectively.

478 Vpu mutants were generated using PCR-based Quick-change site-directed mutagenesis as  
479 per standard protocols (Agilent). The plasmids encoding WT Vpu and Vpu mutants were  
480 generated by insertion of the corresponding Vpu fragments from pNL 4-3 ADA proviral  
481 constructs into the pCGCG-IRES-GFP plasmid, a kind gift from Frank Kirchhoff (75). The  
482 cDNA of human CD47 and mouse CD47 with an HA-tag at the C-terminal were purchased  
483 from Sino Biological and Thermo Fisher Scientific, respectively. The HA-tag was then added  
484 to human CD47 by PCR. Chimeric CD47 consisting of a human extracellular domain and  
485 mouse MSDs+ HA-tagged cytosolic tail was generated by overlapping PCR (see  
486 Supplementary table 1 for oligonucleotides). These fragments were then inserted into  
487 pECFP-N1 (Clontech). Fragments without the HA-tag were also generated by PCR and  
488 inserted into pWPI-IRES-Puro-Ak to create pWPI- hCD47 or pWPI-cCD47 for expression of  
489 human or chimeric CD47, respectively. All constructs were confirmed by sequencing.

490

491

492 **Cell lines**

493 HEK 293T cells and the HeLa TZM-bl indicator cell line were cultured in DMEM (Wisent)  
494 containing 100 U/mL penicillin, 100 mg/mL streptomycin (P/S) and 10% FBS (DMEM-10).  
495 Lymphocytic cell lines were maintained in RPMI 1640 medium (Wisent) containing P/S and  
496 10% FBS (RPMI-10). SupT1 (Dr. Dharam Ablashi (78)) and TZM-bl (Dr. John C. Kappes, and  
497 Dr. Xiaoyun Wu (79)) cells were obtained from the NIH AIDS Reagent Program, whereas  
498 Jurkat E6.1 and HEK 293T cells were acquired from ATCC. The Jurkat E6.1-based CD47  
499 knockout (KO) cell line, JC47, was as described previously (43).

500

501 **CD47 knockout and rescue**

502 To generate a CD47KO Jurkat E6.1 cell line, guide sequence 5'  
503 CACCGGATAGCCTATATCCTCGCTG-3' targeting CD47 was inserted into the lentiCRISPR  
504 v2 vector. Lentiviruses were produced by triple transfection of the generated lentivector with  
505 psPAX2 and pSVCMV-VSV-G in HEK 293T cells as described previously (6). Control  
506 lentiviruses were also produced using the lentiCRISPR v2 without sgRNA. Jurkat E6.1 cells  
507 were transduced with either the control or sgRNA-expressing lentiviruses, selected with  
508 puromycin and the CD47KO population was enriched by fluorescence-activated cell sorting  
509 (FACS).

510 In order to rescue CD47 expression in CD47 KO cells, the JC47 cell line was used.  
511 Lentiviruses were produced by transfecting HEK 293T cells with pWPI-hCD47 or pWPI-  
512 cCD47 and psPAX2 and pSVCMV-VSV-G. JC47 cells were transduced with lentiviruses



513 expressing either hCD47 or cCD47, selected by CD47 surface expression and enriched by  
514 FACS to ensure that CD47 expression levels are comparable with parental Jurkat E6.1.

515

### 516 **Primary cell cultures**

517 Human blood samples were obtained from healthy adult donors following informed consent  
518 in accordance with the Declaration of Helsinki under research protocol approved by the  
519 Research Ethics Review Board of the Institut de Recherches Cliniques de Montréal (IRCM).  
520 Peripheral blood mononuclear cells (PBMCs) were purified from buffy coats following Ficoll  
521 density gradient (GE Healthcare). CD4<sup>+</sup> T cells were isolated by negative selection using  
522 CD4<sup>+</sup> T cell isolation kit (Miltenyi Biotec) according to the manufacturer's protocol. Purified  
523 CD4<sup>+</sup> T cells were activated with 5 µg/mL phytohemagglutinin-L (PHA-L; Sigma-Aldrich,  
524 #11249738001) and 100 U/mL IL-2 (PeproTech, #200-02) for 3 days and cultured in RPMI-  
525 10 containing 100 U/mL IL-2 for another 2 days before infection.

526 PBMCs were seeded for 2 h at 37°C in non-tissue culture treated dishes (Fisherbrand)  
527 containing serum-free RPMI medium. After gentle washes, adherent cells (which mostly  
528 contain monocytes) were cultured for 7 days in RPMI supplemented with 5%  
529 decomplemented autologous human blood plasma and 10 ng/mL M-CSF (R&D system,  
530 #216-MC) to obtain MDMs. Purity of MDMs was determined by CD11b surface staining and  
531 was found to routinely reach > 95 %.

532

533

534 **Virus production and infection**

535 Virus stocks were obtained by transfecting of HEK 293T cells with proviral DNA in the  
536 presence or absence of pSVCMV-VSV-G using polyethylenimine (PEI; Polyscience, #23966).  
537 Briefly, HEK 293T cells were plated at  $5 \times 10^6$  cells per 15 cm dish for overnight incubation  
538 and then transfected with 20  $\mu$ g of total DNA combined with 60  $\mu$ g of PEI. Media was changed  
539 at 18 h post-transfection. Virus-containing supernatants were collected at 48 h post-  
540 transfection, clarified and pelleted by ultracentrifugation onto a 20% sucrose-phosphate-  
541 buffered saline (PBS) cushion for 2 h at 35,000 rpm at 4°C. Viruses were titrated using the  
542 TZM-bl indicator cells as previously described (80).

543 For infection of T cell lines, cells were infected at multiplicity of infection (MOI) of 0.5 or 1.  
544 Primary CD4<sup>+</sup> T cells were infected at MOI of 1 by spin-inoculation as previously described  
545 (81). MDMs (seeded at  $1 \times 10^5$  cells/well in 12 well-plate) were infected at MOI of 2 (for NL  
546 4-3 ADA) or MOI of 5 (for WITO) in 300  $\mu$ L of RPMI-10. Viruses were adsorbed for 6 h at  
547 37°C before medium was replaced with 1 mL of RPMI-10.

548

549 ***In vitro* capture and phagocytosis assays**

550 For flow cytometry-based capture assay, target cells were labelled with 5  $\mu$ M of  
551 carboxyfluorescein succinimidyl ester (CFSE) from a CFSE cell proliferation kit (Invitrogen,  
552 C34554) for 5 min at room temperature, then washed three times with PBS containing 5 %  
553 FBS, and resuspended in RPMI with 5 % FBS before cells ( $4 \times 10^5$ ) were added to MDMs and  
554 cocultured at 37°C. After 2 h of co-culture, MDMs were extensively washed and analyzed by

555 flow cytometry. Capture efficiency was determined as the percentage of CD11b<sup>+</sup> cells  
556 containing CFSE-derived green fluorescence. For phagocytosis assay, target cells were  
557 labelled with 100 ng/ml of pHrodo Green STP ester (Invitrogen, P35369) pH 7.8 for 30 min  
558 at room temperature, resuspended in serum-free RPMI and then added to MDMs. After 2 h  
559 of co-culture at 37°C, MDMs were washed, collected and analyzed. Phagocytosis efficiency  
560 was determined as the percentage of CD11b<sup>+</sup> cells containing pHrodo-derived green  
561 fluorescence.

562

### 563 **Coculture experiments of CD4<sup>+</sup> T cells and autologous MDMs**

564 CD4<sup>+</sup> T cells were infected and after 2 days, washed, and maintained in culture for virus  
565 release during a 6 h incubation. Supernatants were separated from T cells by centrifugation  
566 (300 x *g*, 5 min), and fraction was added to MDMs for “cell-free” and “co-culture” infections,  
567 respectively. After the 6 h of incubation, MDMs were extensively washed to remove  
568 supernatants or T cells, and then cultured for 10 days. Media of MDMs were collected at  
569 specific interval of time for further analysis.

570 For the experiments involving Jasplakinolide (Jasp; Cayman Chemical, #102396-24-7),  
571 MDMs were pretreated with 5 μM of the inhibitor (or vehicle DMSO) for 1h. CD4<sup>+</sup> T cells were  
572 subsequently cocultured with treated or untreated MDMs for 6 h in the presence or absence  
573 of Jasp. MDMs were washed extensively after the coculture and analyzed by flow cytometry  
574 for phagocytosis of pHrodo-labelled CD4<sup>+</sup> target T cells by MDMs, as described above, or  
575 maintained in culture for 10 days for a replication kinetic study. Media of MDMs were collected

576 at day 2 post coculture for measurement of infectious virus production by TZM-bl luciferase  
577 reporter assay (see below). To determine the effect of Jasp on virus production, infected CD4<sup>+</sup>  
578 T cells were washed and incubated with Jasp or DMSO for 6 h, prior to cell supernatants  
579 being collected for quantification of virus production by HIV-1 p24 ELISA (XpressBio).  
580 To assess the effect of reverse transcriptase inhibitor Zidovudine (AZT) or integrase inhibitor  
581 Raltegravir (Ral) on MDM infection, cells were pretreated with 5 µM AZT, 10 µM Ral or vehicle  
582 control DMSO for 2 h, and cocultured with infected CD4<sup>+</sup> T cells in the presence of the drugs.  
583 After 6 h, MDMs were extensively washed to remove the T cells and drugs, and then cultured  
584 for another 2 days. Efficiency of MDMs infection was determined by flow cytometry analysis  
585 of intracellular Gag and production of infectious virus in MDMs-free culture supernatant using  
586 the TZM-bl assay.

587

#### 588 **TZM-bl luciferase reporter assay**

589 TZM-bl cells (2 x 10<sup>4</sup> cells/well seeded in a 24-well plate the previous day) were inoculated  
590 with MDM-free culture supernatant for 6 h at 37°C, washed with PBS and maintained in  
591 DMEM-10. At 48 hpi, cells were lysed in cell culture lysis reagent (E153A, Promega) and  
592 analyzed for luciferase activity using a commercial kit (E1501, Promega).

593

#### 594 **Confocal microscopy**

595 SupT1 cells were infected with VSV-G pseudotyped GFP-expressing WT NL 4-3 ADA virus  
596 for 48 h and cocultured at a ratio of 4:1 with MDMs plated at 1,000 cells/well in an 8-well

597 chamber slide (ibidi, #80806). After 2 h, MDMs were gently washed with PBS and fixed with  
598 4% paraformaldehyde (PFA) for 30 min. Fixed MDMs were incubated for 2 h at 37°C in 5%  
599 milk-PBS containing anti-CD11b, a marker of macrophages. To detect p17, fixed MDMs were  
600 permeabilized in 0.2% Triton X-100 for 5 min, blocked in PBS containing 5% milk for 15 min,  
601 then incubated for 2 h at 37°C in 5% milk-PBS containing anti-p17 Abs which recognizes the  
602 mature matrix protein following Gag precursor processing by the viral protease but not the  
603 immature Gag precursor (73). Cells were washed and incubated with Alexa Fluor 594-  
604 coupled donkey anti-mouse IgG for 30 min at room temperature. Chamber slides were then  
605 washed with PBS and applied with DAPI solution (0.1 µg/mL in PBS) for 5 min, washed again  
606 and mounted using fluorescent mounting medium. Data were acquired using laser-scanning  
607 confocal microscope LSM-710.

608

### 609 **HEK 293T cell transfection**

610 HEK 293T cells were transfected with appropriate plasmids using PEI. When applicable, the  
611 corresponding empty vectors were included in each transfection to ensure the same amount  
612 of transfected DNA in all conditions. For biochemical analyses involving the use of  
613 proteasomal and lysosomal inhibitors, MG132 (10 µM; Sigma-Aldrich, #474787) or  
614 Concanamycin A (ConA, 50 nM; Tocris Bioscience, #2656), respectively, were added to HEK  
615 293T cells 36 h post-transfection. Cells were harvested for analysis 8 h thereafter.

616

617

618 **Western blotting**

619 For SDS-PAGE and Western blotting analysis, cells were lysed in RIPA-DOC buffer (10 mM  
620 Tris pH7.2, 140 mM NaCl, 8 mM Na<sub>2</sub>HPO<sub>4</sub>, 2 mM NaH<sub>2</sub>PO<sub>4</sub>, 1% Nonidet-P40, 0.5 % sodium  
621 dodecyl sulfate, 1.2 mM deoxycholate) supplemented with protease inhibitors (cOmplete,  
622 Roche). Lysates were then mixed with equal volume of 2 x sample buffer (62.5 mM Tris-HCl,  
623 pH 6.8, 2 % SDS, 25 % glycerol, 0.01 % bromophenol blue, 5 % β-mercaptoethanol), and  
624 incubated at 37°C for 30 min as boiling was reported to cause aggregation of CD47 (82).  
625 Proteins from lysates were resolved on 15 % SDS-PAGE, transferred to nitrocellulose  
626 membranes, and reacted with primary antibodies. Endogenous CD47 was detected using a  
627 sheep polyclonal Ab, HA-tagged exogenous CD47 were detected using a rabbit mAb (clone  
628 C29F4). Membranes were then incubated with HRP-conjugated secondary Abs and proteins  
629 visualized by enhanced chemiluminescence (ECL).

630

631 **Co-immunoprecipitation assay**

632 For co-immunoprecipitation studies of Vpu and CD47, transfected HEK 293T cells were lysed  
633 in CHAPS buffer (50 mM Tris, 5 mM EDTA, 100 mM NaCl, 0.5% CHAPS, pH7.2)  
634 supplemented with protease inhibitors. Lysates were first precleared by incubation with 40 μL  
635 of protein A-sepharose beads CL-4B (Sigma, #GE17-0963-03) for 1 h at 4°C and then  
636 incubated with mouse mAb anti-HA (clone 16B12) overnight. The following day, 40 μL of  
637 beads were added and samples were incubated for 2 h, washed five times with CHAPS buffer  
638 and analyzed by Western blotting.

639

## 640 **Flow cytometry**

641 For analysis of CD47 surface expression on T cells, cells were washed with ice-cold  
642 PBS/EDTA (5 mM), stained at 4°C with anti-human CD47 or mouse IgG isotype control diluted  
643 in PBS/FBS (1%) for 30 min. Cells were then washed twice with PBS/FBS (1%) and fixed  
644 with 1% PFA. Apoptosis of target cells was evaluated using the Annexin V-PI detection kit  
645 (eBioscience, #88-8007-72) as per manufacturer's protocol. For surface staining of MDMs,  
646 cells were washed with ice-cold PBS/EDTA (5 mM), detached with Accutase (Sigma-Aldrich,  
647 A6964), blocked in PBS/BSA (1%) /human IgG (blocking buffer) at 4°C for 20 min, and stained  
648 for 30 min with anti-human CD11b before additional washing and fixation with 1% PFA. For  
649 intracellular Gag staining, CD4<sup>+</sup> T cells or MDMs were fixed and permeabilized using the  
650 Cytofix/Cytoperm kit (BD Biosciences) according to manufacturer's instructions and stained  
651 with anti-Gag (KC57) at room temperature for 15 min, washed and resuspended in PBS/FBS  
652 (1%).

653 Flow cytometry data were collected on a Fortessa flow cytometer (BD Bioscience) unless  
654 specially specified. Cell sorting was conducted on a FACS Aria (BD Bioscience). Analyses  
655 were performed using the FlowJo software, version 10.1 for Mac, BD Biosciences.

656

## 657 **ACKNOWLEDGMENTS**

658 We thank members of our laboratory, especially Drs. Robert Lodge, Mariana G Bego and  
659 Sabelo Lukhele for helpful discussions and critical review of the manuscript; Frédéric Dallaire

660 and Mélanie Laporte for technical support. We also thank Eric Massicotte and Julie Lord  
661 (IRCM Flow Cytometry Core) for assistance with flow cytometry; Odile Neyret and Myriam  
662 Rondeau (IRCM Molecular Biology Core) for their support with DNA sequencing; Martine  
663 Gauthier (IRCM clinic) for coordinating access to blood donors and all volunteers for providing  
664 blood samples. The following reagents were obtained through the NIH AIDS Reagent  
665 Program: SupT1 from D. Ablashi, TZM-bl from JC. Kappes and X. Wu, WITO (#11919),  
666 Zidovudine (#3485), Raltegravir (#11680) from Merck & Company, Inc. This study was  
667 supported by grants from the Canadian Institutes of Health Research (CIHR) (FDN 154324) ,  
668 the CIHR supported Canadian HIV Cure Enterprise 2 (CanCURE 2.0) (HB2 164064) , and  
669 the Fonds de Recherche du Québec-Santé AIDS and Infectious Disease Network to É.A.C.  
670 L.C. was supported by studentships from the IRCM and Université de Montréal. É.A.C. is the  
671 recipient of the IRCM-Université de Montréal Chair of Excellence in HIV Research.

672

## 673 REFERENCES

- 674 1. Neil SJ, Zang T, Bieniasz PD. 2008. Tetherin inhibits retrovirus release and is  
675 antagonized by HIV-1 Vpu. *Nature* 451:425-430.
- 676 2. Van Damme N, Goff D, Katsura C, Jorgenson RL, Mitchell R, Johnson MC, Stephens  
677 EB, Guatelli J. 2008. The interferon-induced protein BST-2 restricts HIV-1 release and  
678 is downregulated from the cell surface by the viral Vpu protein. *Cell Host Microbe*  
679 3:245-252.



- 680 3. Wildum S, Schindler M, Munch J, Kirchhoff F. 2006. Contribution of Vpu, Env, and Nef  
681 to CD4 down-modulation and resistance of human immunodeficiency virus type 1-  
682 infected T cells to superinfection. *J Virol* 80:8047-8059.
- 683 4. Pham TN, Lukhele S, Hajjar F, Routy JP, Cohen EA. 2014. HIV Nef and Vpu protect  
684 HIV-infected CD4+ T cells from antibody-mediated cell lysis through down-modulation  
685 of CD4 and BST2. *Retrovirology* 11:15.
- 686 5. Sugden SM, Bego MG, Pham TN, Cohen EA. 2016. Remodeling of the Host Cell  
687 Plasma Membrane by HIV-1 Nef and Vpu: A Strategy to Ensure Viral Fitness and  
688 Persistence. *Viruses* 8:67.
- 689 6. Sugden SM, Pham TN, Cohen EA. 2017. HIV-1 Vpu Downmodulates ICAM-1  
690 Expression, Resulting in Decreased Killing of Infected CD4+ T Cells by NK Cells. *J*  
691 *Virol* 91.
- 692 7. Jain P, Boso G, Langer S, Soonthornvacharin S, De Jesus PD, Nguyen Q, Olivieri KC,  
693 Portillo AJ, Yoh SM, Pache L, Chanda SK. 2018. Large-Scale Arrayed Analysis of  
694 Protein Degradation Reveals Cellular Targets for HIV-1 Vpu. *Cell Rep* 22:2493-2503.
- 695 8. Liu Y, Fu Y, Wang Q, Li M, Zhou Z, Dabbagh D, Fu C, Zhang H, Li S, Zhang T, Gong  
696 J, Kong X, Zhai W, Su J, Sun J, Zhang Y, Yu XF, Shao Z, Zhou F, Wu Y, Tan X. 2019.  
697 Proteomic profiling of HIV-1 infection of human CD4(+) T cells identifies PSGL-1 as an  
698 HIV restriction factor. *Nat Microbiol* 4:813-825.

- 699 9. Prevost J, Edgar CR, Richard J, Trothen SM, Jacob RA, Mumby MJ, Pickering S, Dube  
700 M, Kaufmann DE, Kirchhoff F, Neil SJD, Finzi A, Dikeakos JD. 2020. HIV-1 Vpu  
701 Downregulates Tim-3 from the Surface of Infected CD4(+) T Cells. *J Virol* 94.
- 702 10. Matheson NJ, Sumner J, Wals K, Rapiteanu R, Weekes MP, Vigan R, Weinelt J,  
703 Schindler M, Antrobus R, Costa AS, Frezza C, Clish CB, Neil SJ, Lehner PJ. 2015.  
704 Cell Surface Proteomic Map of HIV Infection Reveals Antagonism of Amino Acid  
705 Metabolism by Vpu and Nef. *Cell Host Microbe* 18:409-423.
- 706 11. Brown EJ, Frazier WA. 2001. Integrin-associated protein (CD47) and its ligands.  
707 *Trends Cell Biol* 11:130-135.
- 708 12. Oldenborg PA. 2013. CD47: A Cell Surface Glycoprotein Which Regulates Multiple  
709 Functions of Hematopoietic Cells in Health and Disease. *ISRN Hematol* 2013:614619.
- 710 13. Barclay AN, Van den Berg TK. 2014. The interaction between signal regulatory protein  
711 alpha (SIRPalpha) and CD47: structure, function, and therapeutic target. *Annu Rev*  
712 *Immunol* 32:25-50.
- 713 14. Myers LM, Tal MC, Torrez Dulgeroff LB, Carmody AB, Messer RJ, Gulati G, Yiu YY,  
714 Staron MM, Angel CL, Sinha R, Markovic M, Pham EA, Fram B, Ahmed A, Newman  
715 AM, Glenn JS, Davis MM, Kaech SM, Weissman IL, Hasenkrug KJ. 2019. A functional  
716 subset of CD8(+) T cells during chronic exhaustion is defined by SIRPalpha  
717 expression. *Nat Commun* 10:794.

- 718 15. Hirayama D, Iida T, Nakase H. 2017. The Phagocytic Function of Macrophage-  
719 Enforcing Innate Immunity and Tissue Homeostasis. *Int J Mol Sci* 19.
- 720 16. Shen R, Richter HE, Clements RH, Novak L, Huff K, Bimczok D, Sankaran-Walters S,  
721 Dandekar S, Clapham PR, Smythies LE, Smith PD. 2009. Macrophages in vaginal but  
722 not intestinal mucosa are monocyte-like and permissive to human immunodeficiency  
723 virus type 1 infection. *J Virol* 83:3258-3267.
- 724 17. Sattentau QJ, Stevenson M. 2016. Macrophages and HIV-1: An Unhealthy  
725 Constellation. *Cell Host Microbe* 19:304-310.
- 726 18. Swingler S, Mann AM, Zhou J, Swingler C, Stevenson M. 2007. Apoptotic killing of  
727 HIV-1-infected macrophages is subverted by the viral envelope glycoprotein. *PLoS*  
728 *Pathog* 3:1281-1290.
- 729 19. Clayton KL, Collins DR, Lengieza J, Ghebremichael M, Dotiwala F, Lieberman J,  
730 Walker BD. 2018. Resistance of HIV-infected macrophages to CD8(+) T lymphocyte-  
731 mediated killing drives activation of the immune system. *Nat Immunol* 19:475-486.
- 732 20. Yukl SA, Sinclair E, Somsouk M, Hunt PW, Epling L, Killian M, Girling V, Li P, Havlir  
733 DV, Deeks SG, Wong JK, Hatano H. 2014. A comparison of methods for measuring  
734 rectal HIV levels suggests that HIV DNA resides in cells other than CD4+ T cells,  
735 including myeloid cells. *AIDS* 28:439-442.
- 736 21. Ganor Y, Real F, Sennepin A, Dutertre CA, Prevedel L, Xu L, Tudor D, Charmeteau B,

- 737 Couedel-Courteille A, Marion S, Zenak AR, Jourdain JP, Zhou Z, Schmitt A, Capron C,  
738 Eugenin EA, Cheynier R, Revol M, Cristofari S, Hosmalin A, Bomsel M. 2019. HIV-1  
739 reservoirs in urethral macrophages of patients under suppressive antiretroviral therapy.  
740 *Nat Microbiol* 4:633-644.
- 741 22. Zalar A, Figueroa MI, Ruibal-Ares B, Bare P, Cahn P, de Bracco MM, Belmonte L. 2010.  
742 Macrophage HIV-1 infection in duodenal tissue of patients on long term HAART.  
743 *Antiviral Res* 87:269-271.
- 744 23. Andrade VM, Mavian C, Babic D, Cordeiro T, Sharkey M, Barrios L, Brander C,  
745 Martinez-Picado J, Dalmau J, Llano A, Li JZ, Jacobson J, Lavine CL, Seaman MS,  
746 Salemi M, Stevenson M. 2020. A minor population of macrophage-tropic HIV-1  
747 variants is identified in recrudescing viremia following analytic treatment interruption.  
748 *Proc Natl Acad Sci U S A* 117:9981-9990.
- 749 24. Shen R, Richter HE, Smith PD. 2011. Early HIV-1 target cells in human vaginal and  
750 ectocervical mucosa. *Am J Reprod Immunol* 65:261-267.
- 751 25. Arrildt KT, LaBranche CC, Joseph SB, Dukhovlina EN, Graham WD, Ping LH,  
752 Schnell G, Sturdevant CB, Kincer LP, Mallewa M, Heyderman RS, Rie AV, Cohen MS,  
753 Spudich S, Price RW, Montefiori DC, Swanstrom R. 2015. Phenotypic Correlates of  
754 HIV-1 Macrophage Tropism. *J Virol* 89:11294-11311.
- 755 26. Koppensteiner H, Brack-Werner R, Schindler M. 2012. Macrophages and their

- 756 relevance in Human Immunodeficiency Virus Type I infection. *Retrovirology* 9:82.
- 757 27. Ochsenbauer C, Edmonds TG, Ding H, Keele BF, Decker J, Salazar MG, Salazar-  
758 Gonzalez JF, Shattock R, Haynes BF, Shaw GM, Hahn BH, Kappes JC. 2012.  
759 Generation of transmitted/founder HIV-1 infectious molecular clones and  
760 characterization of their replication capacity in CD4 T lymphocytes and monocyte-  
761 derived macrophages. *J Virol* 86:2715-2728.
- 762 28. Baxter AE, Russell RA, Duncan CJ, Moore MD, Willberg CB, Pablos JL, Finzi A,  
763 Kaufmann DE, Ochsenbauer C, Kappes JC, Groot F, Sattentau QJ. 2014. Macrophage  
764 infection via selective capture of HIV-1-infected CD4+ T cells. *Cell Host Microbe*  
765 16:711-721.
- 766 29. Ladinsky MS, Khamaikawin W, Jung Y, Lin S, Lam J, An DS, Bjorkman PJ, Kieffer C.  
767 2019. Mechanisms of virus dissemination in bone marrow of HIV-1-infected  
768 humanized BLT mice. *Elife* 8.
- 769 30. Calantone N, Wu F, Klase Z, Deleage C, Perkins M, Matsuda K, Thompson EA, Ortiz  
770 AM, Vinton CL, Ourmanov I, Lore K, Douek DC, Estes JD, Hirsch VM, Brenchley JM.  
771 2014. Tissue myeloid cells in SIV-infected primates acquire viral DNA through  
772 phagocytosis of infected T cells. *Immunity* 41:493-502.
- 773 31. Norris PJ, Pappalardo BL, Custer B, Spotts G, Hecht FM, Busch MP. 2006. Elevations  
774 in IL-10, TNF-alpha, and IFN-gamma from the earliest point of HIV Type 1 infection.

- 775 AIDS Res Hum Retroviruses 22:757-762.
- 776 32. Bego MG, Cote E, Aschman N, Mercier J, Weissenhorn W, Cohen EA. 2015. Vpu  
777 Exploits the Cross-Talk between BST2 and the ILT7 Receptor to Suppress Anti-HIV-1  
778 Responses by Plasmacytoid Dendritic Cells. PLoS Pathog 11:e1005024.
- 779 33. Kupzig S, Korolchuk V, Rollason R, Sugden A, Wilde A, Banting G. 2003. Bst-  
780 2/HM1.24 is a raft-associated apical membrane protein with an unusual topology.  
781 Traffic 4:694-709.
- 782 34. Logtenberg MEW, Jansen JHM, Raaben M, Toebes M, Franke K, Brandsma AM,  
783 Matlung HL, Fauster A, Gomez-Eerland R, Bakker NAM, van der Schot S, Marijt KA,  
784 Verdoes M, Haanen J, van den Berg JH, Neefjes J, van den Berg TK, Brummelkamp  
785 TR, Leusen JHW, Scheeren FA, Schumacher TN. 2019. Glutaminyl cyclase is an  
786 enzymatic modifier of the CD47- SIRPalpha axis and a target for cancer  
787 immunotherapy. Nat Med 25:612-619.
- 788 35. Oldenburg PA, Zheleznyak A, Fang YF, Lagenaur CF, Gresham HD, Lindberg FP. 2000.  
789 Role of CD47 as a marker of self on red blood cells. Science 288:2051-2054.
- 790 36. Bubb MR, Senderowicz AM, Sausville EA, Duncan KL, Korn ED. 1994. Jasplakinolide,  
791 a cytotoxic natural product, induces actin polymerization and competitively inhibits the  
792 binding of phalloidin to F-actin. J Biol Chem 269:14869-14871.
- 793 37. Ospina Stella A, Turville S. 2018. All-Round Manipulation of the Actin Cytoskeleton by

- 794 HIV. Viruses 10.
- 795 38. Vigan R, Neil SJ. 2010. Determinants of tetherin antagonism in the transmembrane  
796 domain of the human immunodeficiency virus type 1 Vpu protein. *J Virol* 84:12958-  
797 12970.
- 798 39. Magadan JG, Bonifacino JS. 2012. Transmembrane domain determinants of CD4  
799 Downregulation by HIV-1 Vpu. *J Virol* 86:757-772.
- 800 40. Kueck T, Foster TL, Weinelt J, Sumner JC, Pickering S, Neil SJ. 2015. Serine  
801 Phosphorylation of HIV-1 Vpu and Its Binding to Tetherin Regulates Interaction with  
802 Clathrin Adaptors. *PLoS Pathog* 11:e1005141.
- 803 41. Margottin F, Bour SP, Durand H, Selig L, Benichou S, Richard V, Thomas D, Strebel  
804 K, Benarous R. 1998. A novel human WD protein, h-beta TrCp, that interacts with HIV-  
805 1 Vpu connects CD4 to the ER degradation pathway through an F-box motif. *Mol Cell*  
806 1:565-574.
- 807 42. Kueck T, Neil SJ. 2012. A cytoplasmic tail determinant in HIV-1 Vpu mediates targeting  
808 of tetherin for endosomal degradation and counteracts interferon-induced restriction.  
809 *PLoS Pathog* 8:e1002609.
- 810 43. Leclair P, Liu CC, Monajemi M, Reid GS, Sly LM, Lim CJ. 2018. CD47-ligation induced  
811 cell death in T-acute lymphoblastic leukemia. *Cell Death Dis* 9:544.
- 812 44. Cham LB, Torrez Dulgeroff LB, Tal MC, Adomati T, Li F, Bhat H, Huang A, Lang PA,

- 813 Moreno ME, Rivera JM, Galkina SA, Kosikova G, Stoddart CA, McCune JM, Myers  
814 LM, Weissman IL, Lang KS, Hasenkrug KJ. 2020. Immunotherapeutic Blockade of  
815 CD47 Inhibitory Signaling Enhances Innate and Adaptive Immune Responses to Viral  
816 Infection. *Cell Rep* 31:107494.
- 817 45. Tal MC, Torrez Dulgeroff LB, Myers L, Cham LB, Mayer-Barber KD, Bohrer AC, Castro  
818 E, Yiu YY, Lopez Angel C, Pham E, Carmody AB, Messer RJ, Gars E, Kortmann J,  
819 Markovic M, Hasenkrug M, Peterson KE, Winkler CW, Woods TA, Hansen P, Galloway  
820 S, Wagh D, Fram BJ, Nguyen T, Corey D, Kalluru RS, Banaei N, Rajadas J, Monack  
821 DM, Ahmed A, Sahoo D, Davis MM, Glenn JS, Adomati T, Lang KS, Weissman IL,  
822 Hasenkrug KJ. 2020. Upregulation of CD47 Is a Host Checkpoint Response to  
823 Pathogen Recognition. *mBio* 11.
- 824 46. Oldenborg PA, Gresham HD, Lindberg FP. 2001. CD47-signal regulatory protein alpha  
825 (SIRPalpha) regulates Fcgamma and complement receptor-mediated phagocytosis. *J*  
826 *Exp Med* 193:855-862.
- 827 47. Gardai SJ, McPhillips KA, Frasch SC, Janssen WJ, Starefeldt A, Murphy-Ullrich JE,  
828 Bratton DL, Oldenborg PA, Michalak M, Henson PM. 2005. Cell-surface calreticulin  
829 initiates clearance of viable or apoptotic cells through trans-activation of LRP on the  
830 phagocyte. *Cell* 123:321-334.
- 831 48. Berkovits BD, Mayr C. 2015. Alternative 3' UTRs act as scaffolds to regulate  
832 membrane protein localization. *Nature* 522:363-367.



- 833 49. Barth ND, Marwick JA, Vendrell M, Rossi AG, Dransfield I. 2017. The "Phagocytic  
834 Synapse" and Clearance of Apoptotic Cells. *Front Immunol* 8:1708.
- 835 50. Morrissey MA, Kern N, Vale RD. 2020. CD47 Ligation Repositions the Inhibitory  
836 Receptor SIRPA to Suppress Integrin Activation and Phagocytosis. *Immunity* 53:290-  
837 302 e296.
- 838 51. Zaitseva E, Zaitsev E, Melikov K, Arakelyan A, Marin M, Villasmil R, Margolis LB,  
839 Melikyan GB, Chernomordik LV. 2017. Fusion Stage of HIV-1 Entry Depends on Virus-  
840 Induced Cell Surface Exposure of Phosphatidylserine. *Cell Host Microbe* 22:99-110  
841 e117.
- 842 52. Akari H, Bour S, Kao S, Adachi A, Strebel K. 2001. The human immunodeficiency virus  
843 type 1 accessory protein Vpu induces apoptosis by suppressing the nuclear factor  
844 kappaB-dependent expression of antiapoptotic factors. *J Exp Med* 194:1299-1311.
- 845 53. Blazar BR, Lindberg FP, Ingulli E, Panoskaltsis-Mortari A, Oldenborg PA, Iizuka K,  
846 Yokoyama WM, Taylor PA. 2001. CD47 (integrin-associated protein) engagement of  
847 dendritic cell and macrophage counterreceptors is required to prevent the clearance  
848 of donor lymphohematopoietic cells. *J Exp Med* 194:541-549.
- 849 54. Jaiswal S, Jamieson CH, Pang WW, Park CY, Chao MP, Majeti R, Traver D, van  
850 Rooijen N, Weissman IL. 2009. CD47 is upregulated on circulating hematopoietic stem  
851 cells and leukemia cells to avoid phagocytosis. *Cell* 138:271-285.

- 852 55. Salazar-Gonzalez JF, Salazar MG, Keele BF, Learn GH, Giorgi EE, Li H, Decker JM,  
853 Wang S, Baalwa J, Kraus MH, Parrish NF, Shaw KS, Guffey MB, Bar KJ, Davis KL,  
854 Ochsenaubauer-Jambor C, Kappes JC, Saag MS, Cohen MS, Mulenga J, Derdeyn CA,  
855 Allen S, Hunter E, Markowitz M, Hraber P, Perelson AS, Bhattacharya T, Haynes BF,  
856 Korber BT, Hahn BH, Shaw GM. 2009. Genetic identity, biological phenotype, and  
857 evolutionary pathways of transmitted/founder viruses in acute and early HIV-1 infection.  
858 *J Exp Med* 206:1273-1289.
- 859 56. Woelk CH, Ottone F, Plotkin CR, Du P, Royer CD, Rought SE, Lozach J, Sasik R,  
860 Kornbluth RS, Richman DD, Corbeil J. 2004. Interferon gene expression following HIV  
861 type 1 infection of monocyte-derived macrophages. *AIDS Res Hum Retroviruses*  
862 20:1210-1222.
- 863 57. Tartour K, Appourchaux R, Gaillard J, Nguyen XN, Durand S, Turpin J, Beaumont E,  
864 Roch E, Berger G, Mahieux R, Brand D, Roingard P, Cimarelli A. 2014. IFITM proteins  
865 are incorporated onto HIV-1 virion particles and negatively imprint their infectivity.  
866 *Retrovirology* 11:103.
- 867 58. Foster TL, Wilson H, Iyer SS, Coss K, Doores K, Smith S, Kellam P, Finzi A, Borrow P,  
868 Hahn BH, Neil SJD. 2016. Resistance of Transmitted Founder HIV-1 to IFITM-  
869 Mediated Restriction. *Cell Host Microbe* 20:429-442.
- 870 59. Wang Y, Pan Q, Ding S, Wang Z, Yu J, Finzi A, Liu SL, Liang C. 2017. The V3 Loop of  
871 HIV-1 Env Determines Viral Susceptibility to IFITM3 Impairment of Viral Infectivity. *J*

- 872 Virol 91.
- 873 60. Krapp C, Hotter D, Gawanbacht A, McLaren PJ, Kluge SF, Sturzel CM, Mack K, Reith  
874 E, Engelhart S, Ciuffi A, Hornung V, Sauter D, Telenti A, Kirchhoff F. 2016. Guanylate  
875 Binding Protein (GBP) 5 Is an Interferon-Inducible Inhibitor of HIV-1 Infectivity. *Cell*  
876 *Host Microbe* 19:504-514.
- 877 61. Tada T, Zhang Y, Koyama T, Tobiume M, Tsunetsugu-Yokota Y, Yamaoka S, Fujita H,  
878 Tokunaga K. 2015. MARCH8 inhibits HIV-1 infection by reducing virion incorporation  
879 of envelope glycoproteins. *Nat Med* 21:1502-1507.
- 880 62. Kourtzelis I, Hajishengallis G, Chavakis T. 2020. Phagocytosis of Apoptotic Cells in  
881 Resolution of Inflammation. *Front Immunol* 11:553.
- 882 63. Ongradi J, Ceccherini-Nelli L, Pistello M, Bendinelli M, Szilagyi J. 1990. [Different  
883 sensitivity to acid reaction of the AIDS virus and virus-producing cells: clinical  
884 conclusions]. *Orv Hetil* 131:1959-1964.
- 885 64. Sturgill-Koszycki S, Schlesinger PH, Chakraborty P, Haddix PL, Collins HL, Fok AK,  
886 Allen RD, Gluck SL, Heuser J, Russell DG. 1994. Lack of acidification in  
887 *Mycobacterium* phagosomes produced by exclusion of the vesicular proton-ATPase.  
888 *Science* 263:678-681.
- 889 65. Shukla S, Richardson ET, Athman JJ, Shi L, Wearsch PA, McDonald D, Banaei N,  
890 Boom WH, Jackson M, Harding CV. 2014. *Mycobacterium tuberculosis* lipoprotein

- 891 LprG binds lipoarabinomannan and determines its cell envelope localization to control  
892 phagolysosomal fusion. *PLoS Pathog* 10:e1004471.
- 893 66. Bracq L, Xie M, Lambele M, Vu LT, Matz J, Schmitt A, Delon J, Zhou P,  
894 Randriamampita C, Bouchet J, Benichou S. 2017. T Cell-Macrophage Fusion Triggers  
895 Multinucleated Giant Cell Formation for HIV-1 Spreading. *J Virol* 91.
- 896 67. Xie M, Leroy H, Mascarau R, Woottum M, Dupont M, Ciccone C, Schmitt A, Raynaud-  
897 Messina B, Verollet C, Bouchet J, Bracq L, Benichou S. 2019. Cell-to-Cell Spreading  
898 of HIV-1 in Myeloid Target Cells Escapes SAMHD1 Restriction. *mBio* 10.
- 899 68. Dargent JL, Lespagnard L, Kornreich A, Hermans P, Clumeck N, Verhest A. 2000. HIV-  
900 associated multinucleated giant cells in lymphoid tissue of the Waldeyer's ring: a  
901 detailed study. *Mod Pathol* 13:1293-1299.
- 902 69. Geny C, Gherardi R, Boudes P, Lionnet F, Cesaro P, Gray F. 1991. Multifocal  
903 multinucleated giant cell myelitis in an AIDS patient. *Neuropathol Appl Neurobiol*  
904 17:157-162.
- 905 70. Vicandi B, Jimenez-Heffernan JA, Lopez-Ferrer P, Patron M, Gamallo C, Colmenero  
906 C, Viguer JM. 1999. HIV-1 (p24)-positive multinucleated giant cells in HIV-associated  
907 lymphoepithelial lesion of the parotid gland. A report of two cases. *Acta Cytol* 43:247-  
908 251.
- 909 71. Lackner AA, Vogel P, Ramos RA, Kluge JD, Marthas M. 1994. Early events in tissues

- 910 during infection with pathogenic (SIVmac239) and nonpathogenic (SIVmac1A11)  
911 molecular clones of simian immunodeficiency virus. *Am J Pathol* 145:428-439.
- 912 72. Dube M, Roy BB, Guiot-Guillain P, Mercier J, Binette J, Leung G, Cohen EA. 2009.  
913 Suppression of Tetherin-restricting activity upon human immunodeficiency virus type  
914 1 particle release correlates with localization of Vpu in the trans-Golgi network. *J Virol*  
915 83:4574-4590.
- 916 73. Bego MG, Cong L, Mack K, Kirchhoff F, Cohen EA. 2016. Differential Control of BST2  
917 Restriction and Plasmacytoid Dendritic Cell Antiviral Response by Antagonists  
918 Encoded by HIV-1 Group M and O Strains. *J Virol* 90:10236-10246.
- 919 74. Munch J, Rajan D, Rucker E, Wildum S, Adam N, Kirchhoff F. 2005. The role of  
920 upstream U3 sequences in HIV-1 replication and CD4+ T cell depletion in human  
921 lymphoid tissue ex vivo. *Virology* 341:313-320.
- 922 75. Sauter D, Schindler M, Specht A, Landford WN, Munch J, Kim KA, Votteler J, Schubert  
923 U, Bibollet-Ruche F, Keele BF, Takehisa J, Ogando Y, Ochsenbauer C, Kappes JC,  
924 Ayoub A, Peeters M, Learn GH, Shaw G, Sharp PM, Bieniasz P, Hahn BH,  
925 Hatziioannou T, Kirchhoff F. 2009. Tetherin-driven adaptation of Vpu and Nef function  
926 and the evolution of pandemic and nonpandemic HIV-1 strains. *Cell Host Microbe*  
927 6:409-421.
- 928 76. Dave VP, Hajjar F, Dieng MM, Haddad E, Cohen EA. 2013. Efficient BST2 antagonism

- 929 by Vpu is critical for early HIV-1 dissemination in humanized mice. *Retrovirology*  
930 10:128.
- 931 77. Sanjana NE, Shalem O, Zhang F. 2014. Improved vectors and genome-wide libraries  
932 for CRISPR screening. *Nat Methods* 11:783-784.
- 933 78. Ablashi DV, Berneman ZN, Kramarsky B, Whitman J, Jr., Asano Y, Pearson GR. 1995.  
934 Human herpesvirus-7 (HHV-7): current status. *Clin Diagn Virol* 4:1-13.
- 935 79. Platt EJ, Wehrly K, Kuhmann SE, Chesebro B, Kabat D. 1998. Effects of CCR5 and  
936 CD4 cell surface concentrations on infections by macrophagetropic isolates of human  
937 immunodeficiency virus type 1. *J Virol* 72:2855-2864.
- 938 80. Lodge R, Ferreira Barbosa JA, Lombard-Vadnais F, Gilmore JC, Deshiere A, Gosselin  
939 A, Wiche Salinas TR, Bego MG, Power C, Routy JP, Ancuta P, Tremblay MJ, Cohen  
940 EA. 2017. Host MicroRNAs-221 and -222 Inhibit HIV-1 Entry in Macrophages by  
941 Targeting the CD4 Viral Receptor. *Cell Rep* 21:141-153.
- 942 81. Richard J, Sindhu S, Pham TN, Belzile JP, Cohen EA. 2010. HIV-1 Vpr up-regulates  
943 expression of ligands for the activating NKG2D receptor and promotes NK cell-  
944 mediated killing. *Blood* 115:1354-1363.
- 945 82. Yuan FF, Mhrshahi S, Fletcher A. 1996. Chemiluminescent enhanced CD47 detection  
946 on Western blotting. *Electrophoresis* 17:219-220.

947

948 **FIGURE LEGENDS**

949 **Figure 1. CD47 is downregulated from the surface of HIV-1-infected CD4<sup>+</sup> T cells by**  
950 **Vpu.** SupT1 T cells or primary CD4<sup>+</sup> T cells were infected with GFP-expressing NL4-3 (WT  
951 or dU) viruses or with either VSV-G pseudotyped GFP-expressing NL 4-3 ADA (WT or dU)  
952 or transmitted/founder WITO (WT or dU) viruses as indicated. After 48 h, cells were stained  
953 with anti-CD47 (clone CC2C6) and analyzed by flow cytometry. **(Top)** Representative flow  
954 cytometry dot-plot graphs with indication of the median fluorescence intensity (MFI) values  
955 for infected (GFP- or Gag-positive) and bystander cells (GFP- or Gag-negative). **(Bottom)**  
956 Summary graphs of relative surface CD47 expression levels at 48 h postinfection (hpi) with  
957 the indicated viruses (n=4). The percent MFI values were calculated relative to that obtained  
958 in the respective bystander cells. Statistical analysis was performed using Mann-Whitney U-  
959 test (\*\*, P < 0.01; \*, P < 0.05), error bars represent standard deviations (SD). Flow cytometry  
960 data for this figure was generated on a CyAn ADP cytometer (Beckman coulter).

961

962 **Figure 2. Vpu-mediated CD47 downregulation enhances capture and phagocytosis of**  
963 **infected T cells by MDMs. (A)** Experimental strategy for HIV-1-infected target cells labelling,  
964 coculture with MDMs for analysis of *in vitro* capture or phagocytosis by flow cytometry. Target  
965 cells were either mock-infected or infected with VSV-G pseudotyped NL 4-3 ADA (WT or dU)  
966 viruses for 48 h and labelled with either CFSE (left) or pHrodo (right). **(B)** Representative flow  
967 cytometry dot-plots of MDMs (CD11b<sup>+</sup>) with percentage numbers of CFSE<sup>+</sup> population

968 corresponding to capture (top); summary graphs for capture of CFSE-labelled CD47  
969 expressing Jurkat E6.1 control (ctrl) or CD47 knockout (KO) Jurkat E6.1 cells by MDMs in  
970 the indicated conditions (bottom). **(C)** Representative flow cytometry dot-plots of MDMs  
971 (CD11b<sup>+</sup>) with percentage numbers of pHrodo<sup>+</sup> populations corresponding to phagocytosis  
972 (top); summary graphs for phagocytosis of pHrodo-labelled target cells by MDMs in the  
973 indicated conditions (bottom). **(B and C)** analyzed by Mann-Whitney U-test (\*,  $P < 0.05$ ; ns,  
974 nonsignificant,  $P > 0.05$ ), error bars represent SD.

975

976 **Figure 3. Phagocytosis of infected CD4<sup>+</sup> T cells promotes productive infection of**  
977 **MDMs by T/F virus. (A)** Experimental strategy for coculture infected CD4<sup>+</sup> T cells with  
978 autologous MDMs, and analysis of MDMs productive infection. MDMs were cocultured for 6  
979 h with WT NL 4-3 ADA- or WITO-infected autologous CD4<sup>+</sup> T cells (**Co-culture**) or were  
980 exposed for 6 h with supernatants from the same HIV-1-infected T cells (**Cell-free**). MDMs  
981 were maintained in culture after washing-off T cells or supernatants, media of MDMs were  
982 collected at the indicated time points to assess the production of infectious particles via  
983 infection of TZM-bl cells and luciferase (Luc) activity assay. **(B)** TZM-bl cells were infected for  
984 48 h with media of MDMs collected at different time points and assayed for Luc activity.  
985 Results are expressed as relative light units (RLU). Shown are RLU of TZM-bl infected with  
986 media collected from MDMs from 3 donors. **(C-D)** GFP-expressing NL 4-3 ADA-infected  
987 SupT1 cells were cocultured for 2 h with MDMs, cells were then stained with anti-CD11b (C)  
988 or anti-p17 Abs (D) as well as DAPI and analyzed by confocal microscopy (scale bar, 10  $\mu$ m),



989 T cells are indicated by white arrows.

990

991 **Figure 4. Inhibition of phagocytosis hinders productive infection of MDMs by T/F virus.**

992 **(A)** Experimental strategy for coculture of infected CD4<sup>+</sup> T cells, with autologous MDMs  
993 pretreated with Jasplakinolide (Jasp), analysis of phagocytosis and MDM productive infection.

994 Pretreated MDMs (1 h with Jasp or vehicle (DMSO)) were cocultured for 6 h with WITO-

995 infected CD4<sup>+</sup> T cells in the presence of Jasp or DMSO. MDMs were also cocultured for 2 h

996 with the same number of pHrodo-treated CD4<sup>+</sup> T cells and analyzed for phagocytosis by flow

997 cytometry. MDMs were maintained in culture after washing-off T cells and collected at the

998 indicated time points for intracellular Gag staining and flow cytometry analysis. Evaluation of

999 infectious virus production was determined as described above using the TZM-bl assay. **(B)**

1000 Inhibition of phagocytosis by Jasp. Representative flow cytometry dot-plots of MDMs (CD11b<sup>+</sup>)

1001 with percentage of pHrodo<sup>+</sup> populations corresponding to phagocytosis of CD4<sup>+</sup> T cells by

1002 MDMs (top) and summary graph (bottom), analyzed by Mann-Whitney U-test, (\*, P < 0.05).

1003 **(C)** Inhibition of MDMs infection by Jasp. Representative flow cytometry dot-plots of MDMs

1004 showing the percentage of Gag<sup>+</sup> cells at the indicated time points (top) following exposure to

1005 infected target cells; summary graph represents the data obtained with MDMs of 3 distinct

1006 donors (bottom). **(D)** TZM-bl cells infected with media from MDMs cocultured with infected

1007 CD4<sup>+</sup> T cells were assayed for Luc activity; shown are RLU detected with media collected

1008 from MDMs from 3 distinct donors. **(E)** Jasp does not affect viral release from infected CD4<sup>+</sup>

1009 T cells. WT WITO virus-infected cells were washed to remove cell-associated virions, and

1010 then treated with Jasp or vehicle DMSO for 6 h. Virus-containing supernatants were collected  
1011 and quantified for p24 by ELISA; shown are the results obtained with CD4<sup>+</sup> T cells from 3  
1012 distinct donors. **(C and E)** Analyzed by two-tailed Student's *t*-test, (\*,  $P < 0.05$ ; ns,  
1013 nonsignificant,  $P > 0.05$ ), error bars represent SD.

1014

1015 **Figure 5. Vpu binds CD47 via its transmembrane domain (TMD) and targets CD47 for**  
1016 **lysosomal degradation. (A)** Vpu induces depletion of CD47. HEK 293T cells were  
1017 cotransfected with plasmids encoding HA-tagged CD47 (pCD47-HA), along with increasing  
1018 concentrations of GFP-marked plasmids expressing wild-type ADA Vpu (pVpu). An empty  
1019 vector expressing GFP alone was added to adjust the total amounts of plasmid DNAs in all  
1020 conditions. Whole cell lysates were analyzed for the indicated proteins by Western blotting.  
1021 A Representative blot is shown (top), and a summary graph of densitometric analysis of CD47  
1022 is presented (bottom), error bars represent SD. **(B)** Vpu-mediated CD47 depletion requires  
1023 the main Vpu functional motifs. HEK 293T were cotransfected with pCD47-HA, along with  
1024 either empty vector, or plasmids encoding WT Vpu, or the indicated Vpu mutants. A  
1025 representative Western blot is shown (top) as well as a summary graph of densitometric  
1026 analysis of CD47 (bottom); statistical significance was determined by Mann-Whitney U-test  
1027 (\*,  $P < 0.05$ ; ns, nonsignificant,  $P > 0.05$ ); error bars represent SD. **(C)** HEK 293T cells were  
1028 co-transfected with the indicated plasmids for 48 h prior to cell lysis and immunoprecipitation  
1029 (IP) using anti-HA antibody. The immunoprecipitates were analyzed for the indicated proteins  
1030 by Western blotting. **(D)** HEK 293T cells were cotransfected with the indicated plasmids for

1031 36 h and vehicle (DMSO), MG132 or Concanamycin A (ConA) were added 8 h before cells  
1032 were harvested and analyzed by Western blotting.

1033

1034 **Figure 6. HIV-1-infected CD4<sup>+</sup> T cells expressing Vpu-resistant chimeric CD47 are less**  
1035 **prone to infect macrophages through phagocytosis. (A)** Flow cytometry histogram to  
1036 validate CD47 surface expression levels in different target Jurkat cell lines including JC47  
1037 (CD47 knockout), JC47-hCD47 (human CD47 reintroduced in JC47), JC47-cCD47 (chimeric  
1038 CD47 reintroduced in JC47). **(B)** JC47-hCD47 and JC47-cCD47 cells were mock-infected or  
1039 infected with VSV-G pseudotyped GFP-expressing WT NL 4-3 ADA virus for 48 h, then  
1040 stained with anti-CD47mAb (clone CC2C6) and analysed by flow cytometry. Representative  
1041 flow cytometry dot-plot graphs with the MFI values in infected (GFP-positive) and bystander  
1042 cells (GFP-negative), (left); summary graphs of relative surface CD47 expression levels at  
1043 48 h after infection (n=4), (right), the percent MFI values were calculated relative to respective  
1044 their GFP-negative cells. Statistical analysis was performed using Mann-Whitney U-test (\*, P  
1045 < 0.05); error bars represent SD. **(C)** The indicated mock or HIV-1-infected target cells were  
1046 labelled with pHrodo and cocultured with MDMs for 2 h, prior to analysis of MDMs by flow  
1047 cytometry. Representative flow cytometry dot-plots of MDMs (CD11b<sup>+</sup>) with percentage of  
1048 pHrodo<sup>+</sup> populations corresponding to phagocytosis of target cells by MDMs (left); summary  
1049 graphs for MDMs (right) from 6 distinct donors, analyzed by Wilcoxon matched-pairs signed  
1050 rank test (\*, P < 0.05; ns, nonsignificant, P > 0.05). **(D)** JC47-hCD47 or JC47-cCD47 cells  
1051 were infected as described and cocultured with MDMs for 6 h. Following washing-off of

1052 infected T cells, MDMs were cultured for 2 days, media of MDMs was collected to infect TZM-  
1053 bl, for luciferase assay. Shown are RLU detected with media collected from MDMs of 3  
1054 distinct donors, error bars represent SD.

1055

## 1056 **SUPPLEMENTARY FIGURE LEGENDS**

1057 **Figure S1. Vpu downregulates overall levels of surface CD47.** Jurkat E6.1 cells were  
1058 infected with VSV-G pseudotyped GFP-expressing NL 4-3 ADA (WT or dU) viruses and  
1059 stained after 48 h with the indicated anti-CD47 mAbs (CC2C6 or B6H12) prior to flow  
1060 cytometry analysis. **(Left)** Representative flow cytometry dot-plot graphs with indication of  
1061 MFI values for infected (GFP-positive) and bystander cells (GFP-negative). **(Right)** Summary  
1062 graphs of relative surface CD47 expression levels at 48 hpi with the indicated viruses (n=4).  
1063 The percent MFI values were calculated relative to the respective GFP-negative cells.  
1064 Statistical analysis was performed using Mann-Whitney U-test (\*,  $P < 0.05$ ), error bars  
1065 represent SD.

1066

1067 **Figure S2. *In vitro* capture and phagocytosis assay controls. (A-D)** Characterization of  
1068 target Jurkat E6.1 cell lines. **(A)** Flow cytometry histogram to validate CD47 surface  
1069 expression levels in the indicated Jurkat cell lines; the y axis shows relative cell count for  
1070 each population (normalized to mode) while the x axis shows fluorescence intensity of CD47.  
1071 **(B)** Western blotting to assess total CD47 protein levels in the tested target Jurkat cell lines.  
1072 **(C, D)** Summary graphs depicting the capture or phagocytosis of target Jurkat cell lines by

1073 MDMs as determined by CFSE- or pHrodo- labelling, respectively. Knockout of CD47 resulted  
1074 in a better capture and phagocytosis of target cells by MDMs; n= 4 donors. **(E)** Representative  
1075 flow cytometry dot-plots of Annexin V-propidium iodide (PI) staining of the indicated tested  
1076 mock-infected or HIV-infected target cells for capture and phagocytosis assays (left);  
1077 summary graphs for percentage of Annexin V<sup>+</sup> population of tested target cells (right), n=5.  
1078 **(C-E)** Statistical analysis was performed by Mann-Whitney U-test, (\*\*, P < 0.01; \*, P < 0.05;  
1079 ns, nonsignificant, P > 0.05), error bars represent SD.

1080

1081 **Figure S3. Experimental controls. (A)** Infection of MDMs by WT NL 4-3 ADA (M-tropic) at  
1082 MOI of 2, or WITO (T/F) at a MOI of 5; shown are the frequency of Gag<sup>+</sup> MDMs from 3 donors  
1083 at the indicated time points. **(B)** Infection levels of primary CD4<sup>+</sup> T cells used for coculture  
1084 with autologous MDMs; intracellular Gag staining was performed at 48 hpi and measured by  
1085 flow cytometry. Statistical analysis was performed using Mann-Whitney U-test (ns,  
1086 nonsignificant, P>0.05).

1087

1088 **Figure S4. Inhibition of reverse transcription and integration hinders the productive**  
1089 **infection of MDMs.** MDMs were pretreated with raltegravir (Ral) or AZT, and cocultured with  
1090 WT WITO-infected autologous primary CD4<sup>+</sup> T cells in the presence of indicated drugs or  
1091 vehicle (DMSO) for 6 h. After washing-off T cells and drugs, MDMs were cultured for 2 days  
1092 and assayed for intracellular Gag by flow cytometry. Media of MDMs were collected at day 2  
1093 to infect TZM-bl cells as well. **(A)** Representative flow cytometry dot-plots showing the

1094 percentage of Gag<sup>+</sup> cells at day 2 post coculture (top) and summary graph for MDMs from 3  
1095 distinct donors (bottom). **(B)** TZM-bl cells infected with media of MDMs collected at day 2  
1096 were assayed for Luc activity; shown are RLU detected with media collected from MDMs from  
1097 2 distinct donors; error bars represent SD.

1098

1099 **Figure S5. Generation and characterization of chimeric CD47.** Chimeric CD47 was  
1100 generated by replacing the five membrane-spanning domains (MSDs) and cytoplasmic tail  
1101 (CT) of human CD47 with the corresponding regions of mouse CD47. HEK 293T cells were  
1102 co-transfected with plasmids encoding HA-tagged human, chimeric or mouse CD47 (HA-  
1103 tagged at C-terminal), along with Vpu-expressing plasmid (pVpu). Whole cell lysates were  
1104 analyzed by Western blotting. ECD: extracellular domain.

1105

1106 **Figure S6. Apoptosis control for phagocytosis assay.** **(Left)** Representative flow  
1107 cytometry dot-plots of Annexin V-PI staining of the indicated tested target cells used for  
1108 phagocytosis assay; **(Right)** summary graphs for percentage of Annexin V<sup>+</sup> population of  
1109 target cells, n=4, analyzed by Mann-Whitney U-test, (ns, nonsignificant, P > 0.05), error bars  
1110 represent SD.

1111

1112 **Table S1. Oligonucleotides used in this study.**

1113

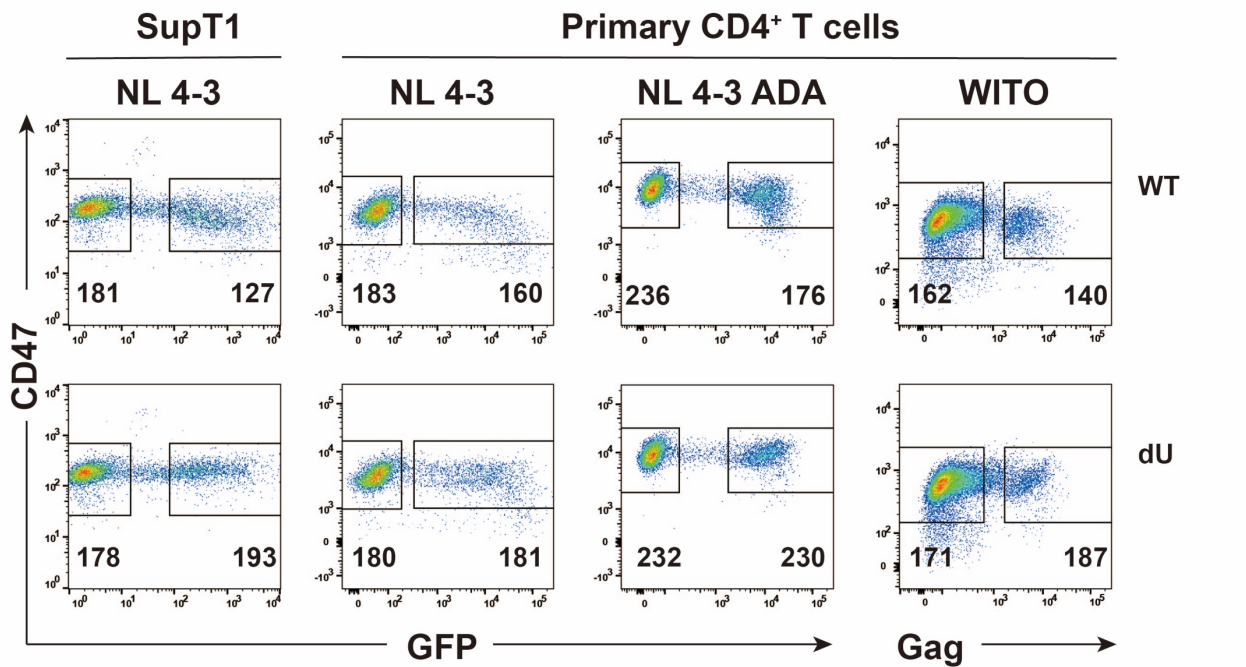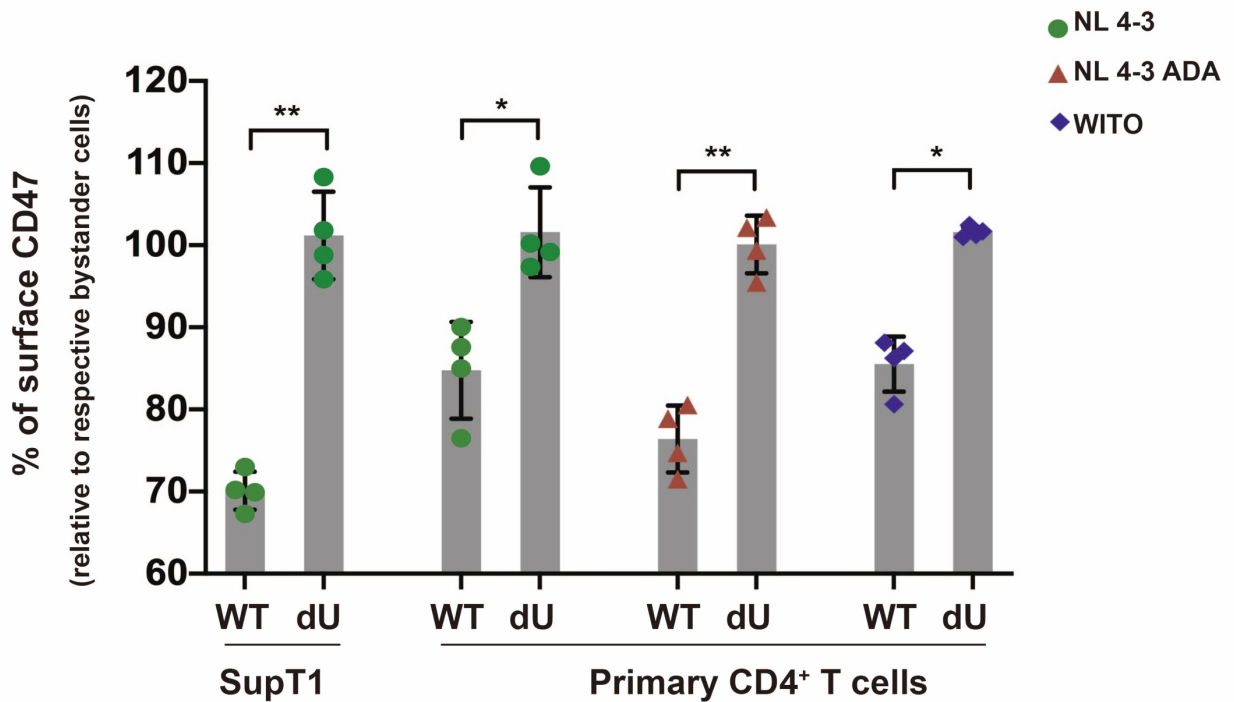

**Figure 1. CD47 is downregulated from the surface of HIV-1-infected CD4<sup>+</sup> T cells by Vpu.** SupT1 T cells or primary CD4<sup>+</sup> T cells were infected with GFP-expressing NL4-3 (WT or dU) viruses or with either VSV-G pseudotyped GFP-expressing NL 4-3 ADA (WT or dU) or transmitted/founder WITO (WT or dU) viruses as indicated. After 48 h, cells were stained with anti-CD47 (clone CC2C6) and analyzed by flow cytometry. **(Top)** Representative flow cytometry dot-plot graphs with indication of the median fluorescence intensity (MFI) values for infected (GFP- or Gag-positive) and bystander cells (GFP- or Gag-negative). **(Bottom)** Summary graphs of relative surface CD47 expression levels at 48 h postinfection (hpi) with the indicated viruses (n=4). The percent MFI values were calculated relative to that obtained in the respective bystander cells. Statistical analysis was performed using Mann-Whitney U-test (\*\*, P < 0.01; \*, P < 0.05), error bars represent standard deviations (SD). Flow cytometry data for this figure was generated on a CyAn ADP cytometer (Beckman coulter).



**A**CFSE-labelled  
infected T cells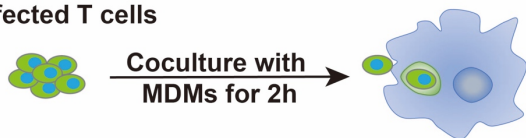pHrodo-labelled  
infected T cells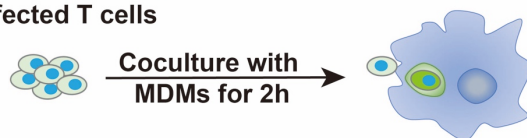**B**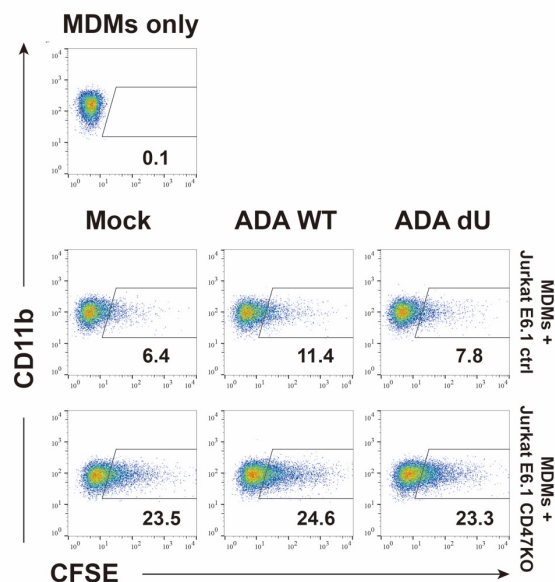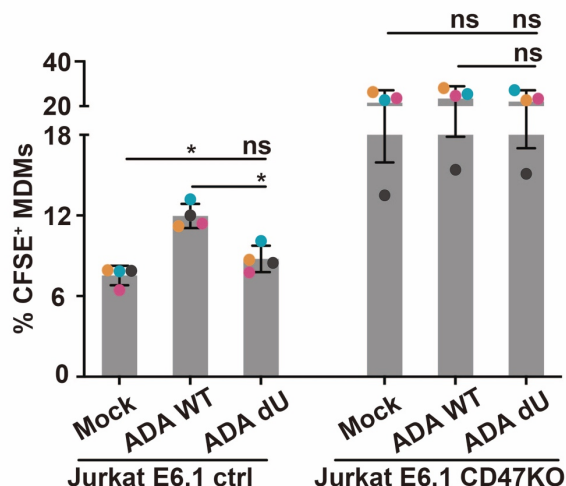**C**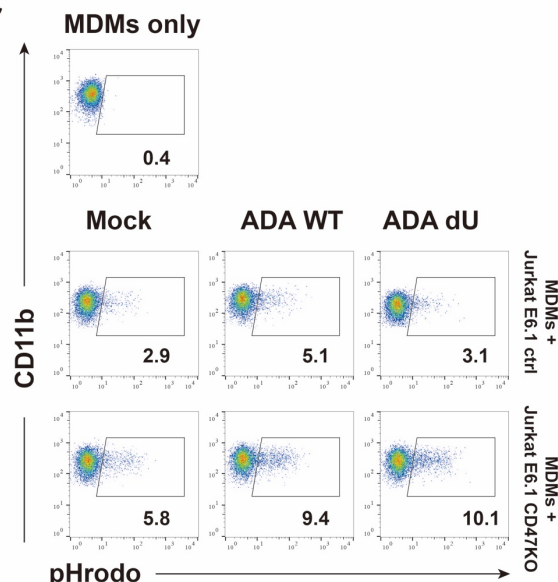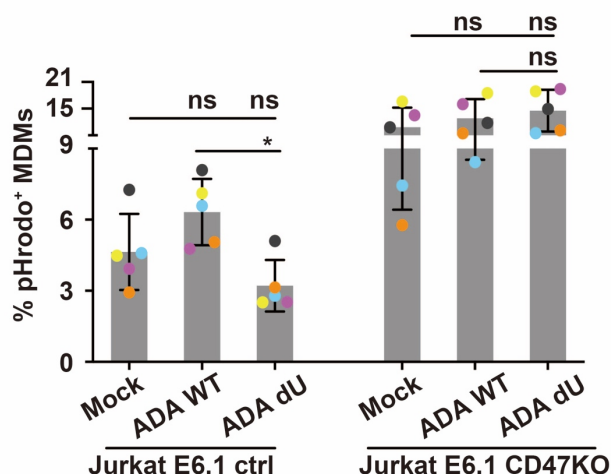

**Figure 2. Vpu-mediated CD47 downregulation enhances capture and phagocytosis of infected T cells by MDMs.** (A) Experimental strategy for HIV-1-infected target cells labelling, coculture with MDMs for analysis of *in vitro* capture or phagocytosis by flow cytometry. Target cells were either mock-infected or infected with VSV-G pseudotyped NL 4-3 ADA (WT or dU) viruses for 48 h and labelled with either CFSE (left) or pHrodo (right). (B) Representative flow cytometry dot-plots of MDMs (CD11b<sup>+</sup>) with percentage numbers of CFSE<sup>+</sup> population corresponding to capture (top); summary graphs for capture of CFSE-labelled CD47 expressing Jurkat E6.1 control (ctrl) or CD47 knockout (KO) Jurkat E6.1 cells by MDMs in the indicated conditions (bottom). (C) Representative flow cytometry dot-plots of MDMs (CD11b<sup>+</sup>) with percentage numbers of pHrodo<sup>+</sup> populations corresponding to phagocytosis (top); summary graphs for phagocytosis of pHrodo-labelled target cells by MDMs in the indicated conditions (bottom). (B and C) analyzed by Mann-Whitney U-test (\*,  $P < 0.05$ ; ns, nonsignificant,  $P > 0.05$ ), error bars represent SD.





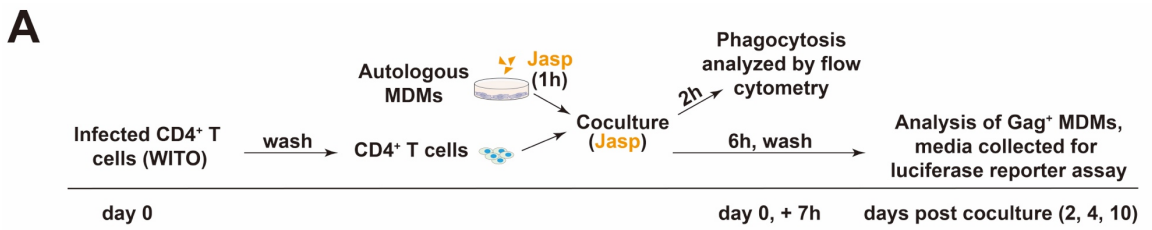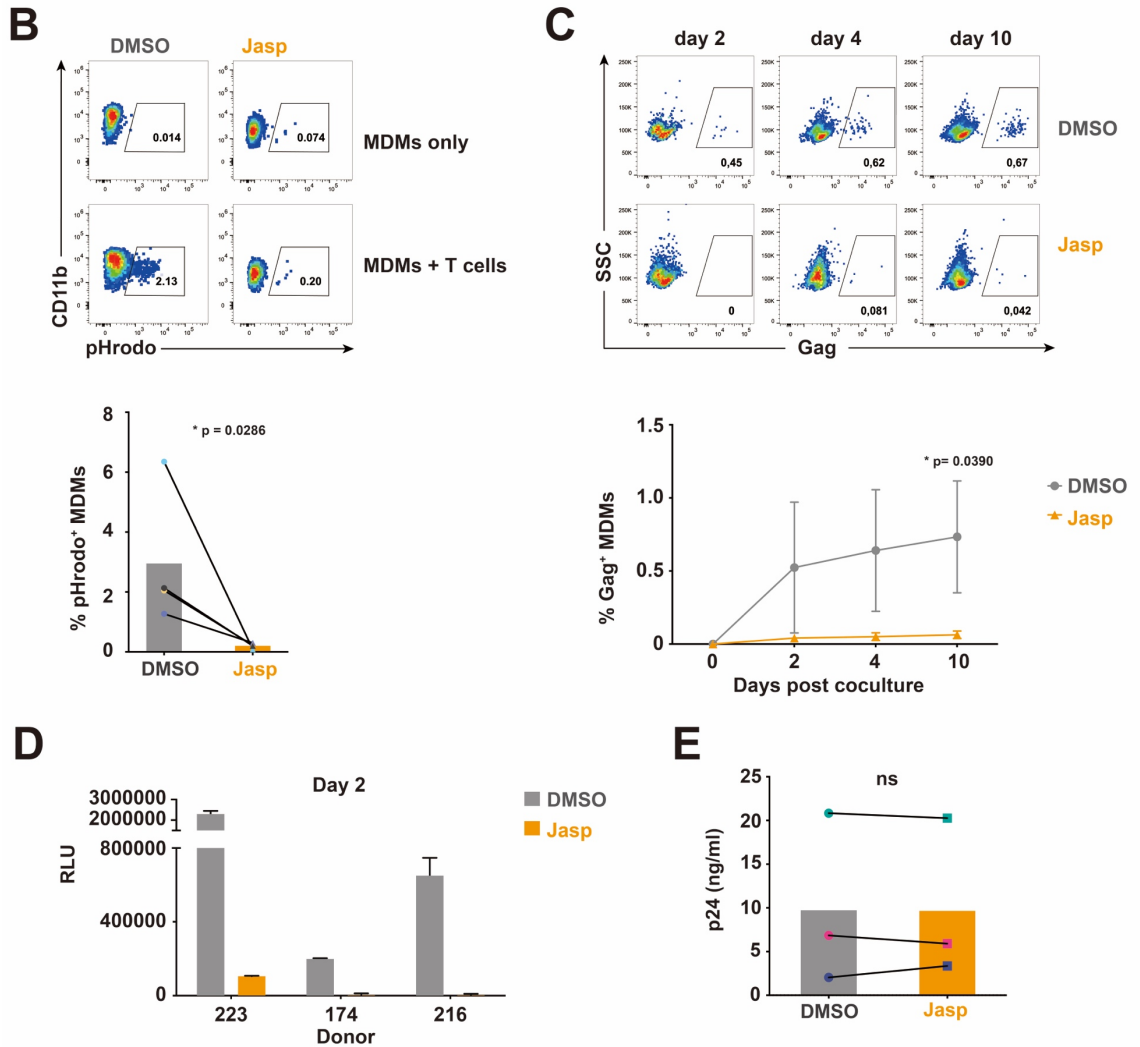

**Figure 4. Inhibition of phagocytosis hinders productive infection of MDMs by T/F virus. (A)** Experimental strategy for coculture of infected CD4<sup>+</sup> T cells, with autologous MDMs pretreated with Jasplakinolide (Jasp), analysis of phagocytosis and MDM productive infection. Pretreated MDMs (1 h with Jasp or vehicle (DMSO)) were cocultured for 6 h with WITO-infected CD4<sup>+</sup> T cells in the presence of Jasp or DMSO. MDMs were also cocultured for 2 h with the same number of pHrodo-treated CD4<sup>+</sup> T cells and analyzed for phagocytosis by flow cytometry. MDMs were maintained in culture after washing-off T cells and collected at the indicated time points for intracellular Gag staining and flow cytometry analysis. Evaluation of infectious virus production was determined as described above using the TZM-bl assay. **(B)** Inhibition of phagocytosis by Jasp. Representative flow cytometry dot-plots of MDMs (CD11b<sup>+</sup>) with percentage of pHrodo<sup>+</sup> populations corresponding to phagocytosis of CD4<sup>+</sup> T cells by MDMs (top) and summary graph (bottom), analyzed by Mann-Whitney U-test, (\*, P < 0.05). **(C)** Inhibition of MDMs infection by Jasp. Representative flow cytometry dot-plots of MDMs showing the percentage of Gag<sup>+</sup> cells at the indicated time points (top) following exposure to infected target cells; summary graph represents the data obtained with MDMs of 3 distinct donors (bottom). **(D)** TZM-bl cells infected with media from MDMs cocultured with infected CD4<sup>+</sup> T cells were assayed for Luc activity; shown are RLU detected with media collected from MDMs from 3 distinct donors. **(E)** Jasp does not affect viral release from infected CD4<sup>+</sup> T cells. WT WITO virus-infected cells were washed to remove cell-associated virions, and then treated with Jasp or vehicle DMSO for 6 h. Virus-containing supernatants were collected and quantified for p24 by ELISA; shown are the results obtained with CD4<sup>+</sup> T cells from 3 distinct donors. **(C and E)** Analyzed by two-tailed Student's *t*-test, (\*, P < 0.05; ns, nonsignificant, P > 0.05), error bars represent SD.

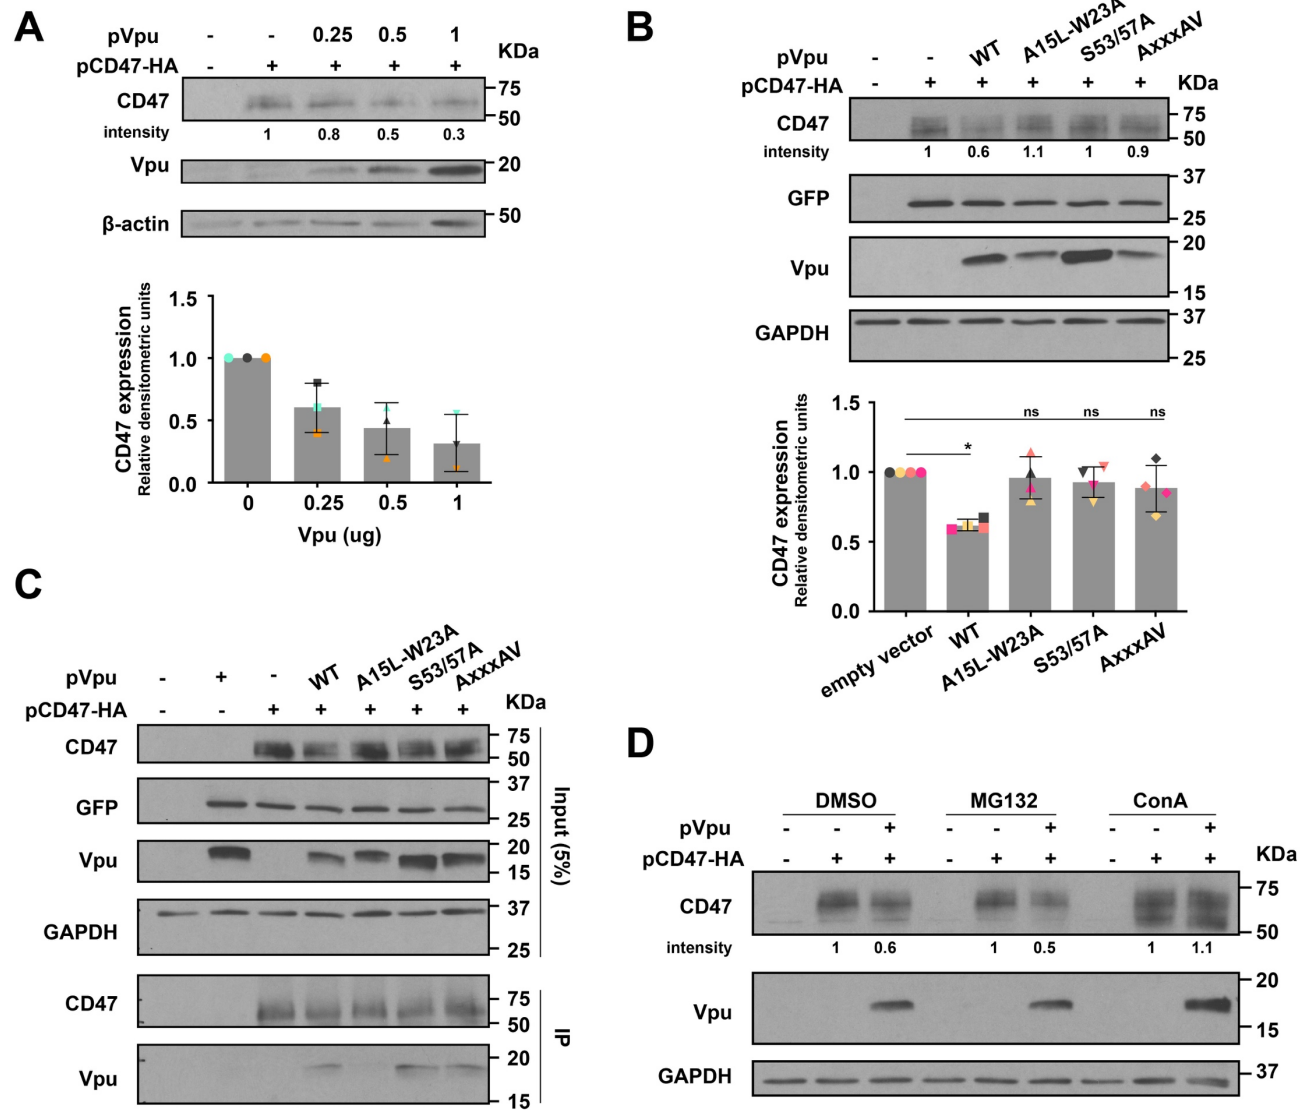

**Figure 5. Vpu binds CD47 via its transmembrane domain (TMD) and targets CD47 for lysosomal degradation.** (A) Vpu induces depletion of CD47. HEK 293T cells were cotransfected with plasmids encoding HA-tagged CD47 (pCD47-HA), along with increasing concentrations of GFP-marked plasmids expressing wild-type ADA Vpu (pVpu). An empty vector expressing GFP alone was added to adjust the total amounts of plasmid DNAs in all conditions. Whole cell lysates were analyzed for the indicated proteins by Western blotting. A Representative blot is shown (top), and a summary graph of densitometric analysis of CD47 is presented (bottom), error bars represent SD. (B) Vpu-mediated CD47 depletion requires the main Vpu functional motifs. HEK 293T were cotransfected with pCD47-HA, along with either empty vector, or plasmids encoding WT Vpu, or the indicated Vpu mutants. A representative Western blot is shown (top) as well as a summary graph of densitometric analysis of CD47 (bottom); statistical significance was determined by Mann-Whitney U-test (\*,  $P < 0.05$ ; ns, nonsignificant,  $P > 0.05$ ); error bars represent SD. (C) HEK 293T cells were co-transfected with the indicated plasmids for 48 h prior to cell lysis and immunoprecipitation (IP) using anti-HA antibody. The immunoprecipitates were analyzed for the indicated proteins by Western blotting. (D) HEK 293T cells were cotransfected with the indicated plasmids for 36 h and vehicle (DMSO), MG132 or Concanamycin A (ConA) were added 8 h before cells were harvested and analyzed by Western blotting.

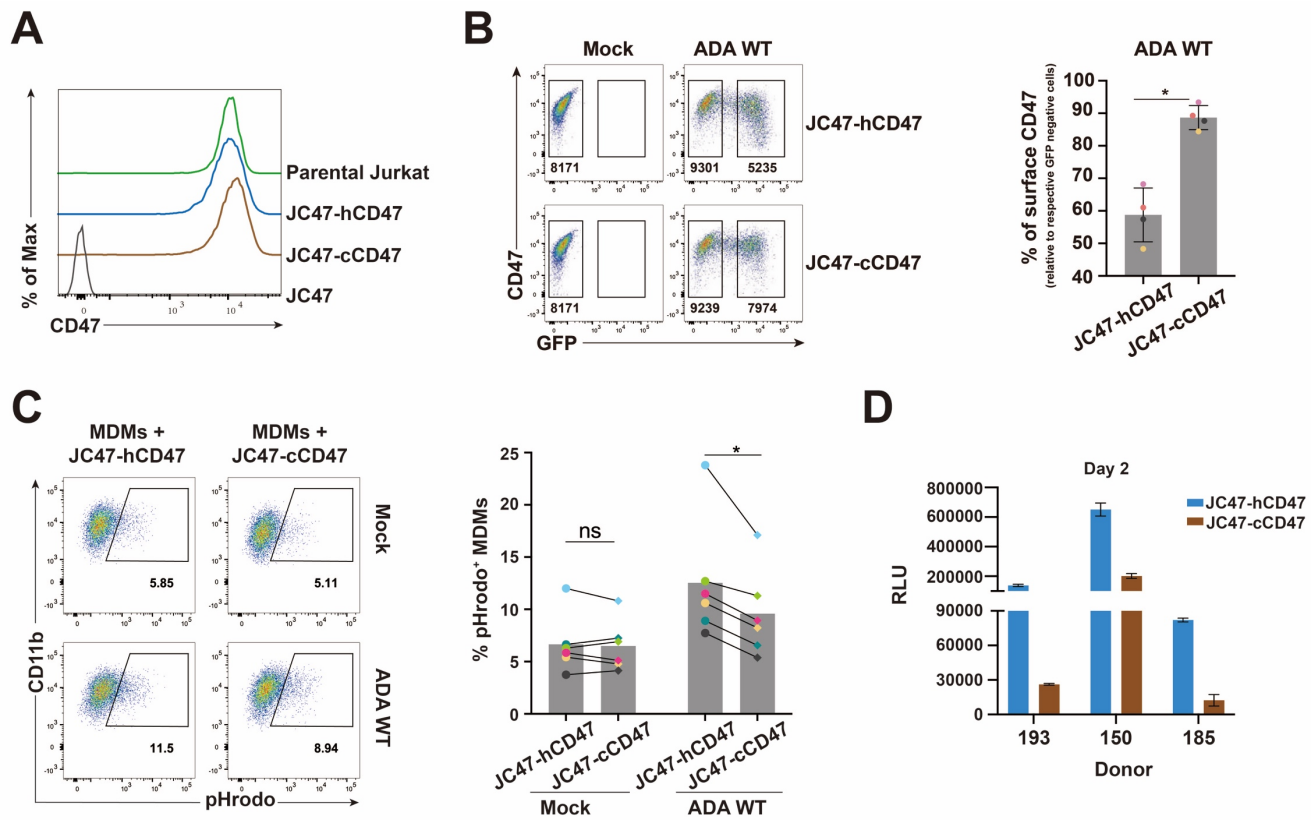

**Figure 6. HIV-1-infected CD4<sup>+</sup> T cells expressing Vpu-resistant chimeric CD47 are less prone to infect macrophages through phagocytosis. (A)** Flow cytometry histogram to validate CD47 surface expression levels in different target Jurkat cell lines including JC47 (CD47 knockout), JC47-hCD47 (human CD47 reintroduced in JC47), JC47-cCD47 (chimeric CD47 reintroduced in JC47). **(B)** JC47-hCD47 and JC47-cCD47 cells were mock-infected or infected with VSV-G pseudotyped GFP-expressing WT NL 4-3 ADA virus for 48 h, then stained with anti-CD47mAb (clone CC2C6) and analysed by flow cytometry. Representative flow cytometry dot-plot graphs with the MFI values in infected (GFP-positive) and bystander cells (GFP-negative), (left); summary graphs of relative surface CD47 expression levels at 48 h after infection (n=4), (right), the percent MFI values were calculated relative to respective their GFP-negative cells. Statistical analysis was performed using Mann-Whitney U-test (\*,  $P < 0.05$ ); error bars represent SD. **(C)** The indicated mock or HIV-1-infected target cells were labelled with pHrodo and cocultured with MDMs for 2 h, prior to analysis of MDMs by flow cytometry. Representative flow cytometry dot-plots of MDMs (CD11b<sup>+</sup>) with percentage of pHrodo<sup>+</sup> populations corresponding to phagocytosis of target cells by MDMs (left); summary graphs for MDMs (right) from 6 distinct donors, analyzed by Wilcoxon matched-pairs signed rank test (\*,  $P < 0.05$ ; ns, nonsignificant,  $P > 0.05$ ). **(D)** JC47-hCD47 or JC47-cCD47 cells were infected as described and cocultured with MDMs for 6 h. Following washing-off of infected T cells, MDMs were cultured for 2 days, media of MDMs was collected to infect TZM-bl, for luciferase assay. Shown are RLU detected with media collected from MDMs of 3 distinct donors, error bars represent SD.
